# Supplementary material for: A Nomogram Model Developed and Validated for The Evaluation of Lymph Node Metastasis in Patients with Rectal Cancer
Source: Research Square preprint supplement (doi:10.21203/rs.3.rs-1297512/v1), 2022-02-14
Supplement: Supplementary file 1 [file 723638e2ce8d4896f54b7f9f.xls]

## Sheet: Supplementary File 1
Training set
Number	LNM	original_firstorder_10Percentile	original_firstorder_90Percentile	original_firstorder_Energy	original_firstorder_Entropy	original_firstorder_InterquartileRange	original_firstorder_Kurtosis	original_firstorder_Maximum	original_firstorder_Mean	original_firstorder_MeanAbsoluteDeviation	original_firstorder_Median	original_firstorder_Minimum	original_firstorder_Range	original_firstorder_RobustMeanAbsoluteDeviation	original_firstorder_RootMeanSquared	original_firstorder_Skewness	original_firstorder_TotalEnergy	original_firstorder_Uniformity	original_firstorder_Variance	original_glcm_Autocorrelation	original_glcm_ClusterTendency	original_glcm_Contrast	original_glcm_Correlation	original_glcm_DifferenceAverage	original_glcm_DifferenceEntropy	original_glcm_DifferenceVariance	original_glcm_Id	original_glcm_Idm	original_glcm_Idmn	original_glcm_Idn	original_glcm_Imc1	original_glcm_Imc2	original_glcm_InverseVariance	original_glcm_JointAverage	original_glcm_JointEnergy	original_glcm_JointEntropy	original_glcm_MaximumProbability	original_glcm_SumEntropy	original_glcm_SumSquares	original_gldm_DependenceEntropy	original_gldm_DependenceNonUniformity	original_gldm_DependenceNonUniformityNormalized	original_gldm_DependenceVariance	original_gldm_GrayLevelNonUniformity	original_gldm_GrayLevelVariance	original_gldm_HighGrayLevelEmphasis	original_gldm_LargeDependenceEmphasis	original_gldm_LargeDependenceHighGrayLevelEmphasis	original_gldm_LargeDependenceLowGrayLevelEmphasis
1	N0	0.695809	0.721599	-0.883026	0.643594	0.0640607	-0.519359	-0.0882845	0.771673	0.22277	0.742817	0.340231	-0.181278	0.135323	0.762712	-0.337414	-0.78506	-0.551949	0.0243911	0.332483	-0.0550736	0.176326	-0.0747757	0.600666	0.666518	-0.070301	-0.983466	-1.00026	-0.388275	-0.698979	-0.31436	0.648406	-0.823723	0.523917	-0.601407	0.413213	-0.598685	0.41998	-0.0433869	-0.455705	-0.936246	1.20851	-1.15229	-1.25911	0.0257652	0.377291	-1.09087	-0.262814	-0.493535
2	N0	0.85974	0.530131	-0.428261	-0.663563	-1.02388	0.50819	0.57721	0.661247	-0.160473	0.545093	1.70924	0.0809642	-0.830642	0.654287	1.06205	-0.730684	1.02982	0.0306151	-0.91797	-0.10932	0.26255	-0.317956	-0.049094	-0.0543588	0.558808	0.324627	0.348336	-0.129066	0.299676	-0.167148	0.0979648	0.395554	-1.12626	0.709949	-0.794085	0.76126	-0.780051	-0.0909732	-0.587188	-0.821945	-0.544101	0.276818	-0.329673	0.02851	-0.84939	0.221848	-0.853566	0.334794
3	N0	0.978741	-0.179474	0.887322	-1.22021	-0.808796	-0.673061	-0.908501	0.543346	-1.18121	0.795464	-0.0637344	-0.864735	-0.872766	0.424027	-1.68958	0.90167	0.831669	-1.06963	0.350516	-0.985013	-1.29939	0.82888	-1.48207	-1.87679	-1.29935	1.26424	1.23637	1.21576	0.958158	-0.414318	0.180469	1.62494	0.743344	0.677388	-1.26384	-0.0280328	-1.00322	-1.02299	-0.488392	0.326619	-0.74161	0.0730647	1.3251	-1.06819	0.190964	0.695097	1.61965	-0.494746
4	N0	0.266584	-0.537425	0.552977	-0.964022	-0.663748	-0.226127	-0.490384	-0.13899	-0.872634	-0.0399414	0.531203	-0.625533	-0.728163	-0.234929	-0.0323765	0.341829	0.80468	-0.860822	-0.794472	-0.795017	-0.956682	0.294974	-0.927635	-0.909687	-0.957338	0.603883	0.55842	0.735492	0.485995	0.475226	-0.500396	0.777903	-0.69477	0.406781	-0.732162	0.450417	-0.851505	-0.820563	-0.463287	0.453876	-0.684843	0.201701	1.43982	-0.860451	-0.864068	0.319615	-0.402187	-0.20128
5	N0	0.461446	-0.789932	-0.254573	-1.81071	-1.35603	1.25621	-0.276476	-0.132033	-1.24163	-0.0105758	0.449259	-0.394715	-1.34558	-0.236871	1.10622	-0.847482	2.38192	-0.938782	-0.821201	-0.913367	-1.06336	0.153279	-1.29135	-1.38147	-0.973241	1.48861	1.50345	1.08031	1.16028	0.123827	-0.633749	1.42352	-0.696484	2.38649	-1.83504	2.0342	-1.84275	-0.940734	-1.06896	-0.641942	-1.35468	1.13757	1.03087	-0.937629	-0.879673	1.51463	-0.019065	-0.0919109
6	N0	-0.158527	-1.26563	-0.63254	-1.95937	-1.2854	3.35473	-0.187019	-0.707028	-1.36127	-0.492684	0.84006	-0.417509	-1.31311	-0.817649	2.04113	-1.0664	2.1237	-0.997666	-1.41547	-0.952249	-1.24735	0.693424	-1.5931	-1.95105	-1.17157	1.853	1.85647	1.35958	1.50729	-0.401958	-0.240197	1.68197	-1.79272	2.21498	-2.09635	1.63896	-1.88618	-0.988475	-0.930984	-0.76775	-1.27869	1.27974	0.574341	-0.995921	-1.45888	1.9548	-0.899868	2.22398
7	N0	0.471674	-1.07685	-0.397429	-3.01519	-1.74812	-0.845379	-2.19667	-0.358439	-1.82526	-0.0874676	0.574432	-2.29535	-1.70011	-0.503591	-2.05804	-0.0402245	4.19456	-1.28463	-1.02625	-1.22216	-1.45	0.114458	-1.98839	-2.69125	-1.38972	2.64768	2.67924	-0.00777416	-0.344948	-0.242375	-0.982366	2.0728	-0.916356	5.09555	-3.0883	4.57344	-2.8979	-1.26028	-1.60918	-0.832164	-1.78497	2.22785	1.82958	-1.28363	-1.13639	3.25249	0.425421	0.197341
8	N0	-1.41631	-1.59388	-0.999448	-0.831373	-0.791167	-0.366219	-1.42289	-1.7075	-0.743944	-1.56974	-0.645072	-1.20128	-0.723577	-1.7801	-0.0564461	-1.15604	0.781246	-0.762801	-1.19384	-0.796373	-0.601496	-0.825547	-0.711233	-0.604827	-0.472672	0.971423	1.0064	-0.896822	-0.482574	0.133285	-0.265876	0.891261	-1.37006	0.962798	-0.924777	1.33724	-0.909375	-0.802171	-0.307828	-0.813771	-1.12009	1.24683	-0.165081	-0.763245	-1.17085	1.0834	-0.78819	0.790908
9	N0	-0.0153243	-0.49108	-0.98715	-0.685167	-0.547498	-0.133643	-0.607166	-0.261212	-0.622182	-0.195735	0.64895	-0.772043	-0.579541	-0.334245	0.145684	-1.14688	0.446798	-0.666385	-0.988473	-0.654441	-0.821883	0.363974	-0.996261	-0.991093	-0.693944	1.15387	1.16589	0.36221	0.469132	-1.23971	0.813894	1.11094	-1.05677	0.822975	-1.16251	0.90417	-0.617191	-0.677377	-0.356184	-1.21871	-1.11909	0.880917	-0.884881	-0.669568	-1.01776	0.98933	-0.677607	0.531804
10	N0	-0.61019	-0.44371	-0.679738	-0.26914	-0.0852683	-0.721122	-1.01942	-0.750495	-0.159798	-0.777746	0.301505	-1.07502	-0.0126609	-0.791315	-0.288012	-0.917955	0.066945	-0.436448	-1.08488	-0.396038	-0.719739	0.715303	-0.643695	-0.490622	-0.71356	0.591805	0.618784	-0.32243	-0.410456	-0.556129	0.543181	0.790028	-1.3385	0.3664	-0.511097	0.0891561	-0.240362	-0.422252	-0.187869	-0.65116	-0.724128	0.671436	-0.402376	-0.43611	-1.07537	0.477268	-1.01589	1.63937
11	N0	-0.337517	-0.957998	-0.660056	-0.889583	-0.70428	1.08787	0.417151	-0.572379	-0.286313	-0.594949	0.851712	0.166183	-0.802963	-0.560091	1.54253	-0.903299	0.977992	0.0252784	-1.15664	0.0276943	-0.497233	0.920491	-1.0012	-1.20034	-0.139643	1.83898	1.92379	0.751004	1.29863	-1.89776	1.01836	1.48238	-1.68648	1.82172	-1.62886	1.6068	-0.900456	-0.000844555	0.242179	-1.00655	-1.69203	2.31962	-0.119907	0.0272733	-1.12447	2.47209	-0.969652	5.7419
12	N0	0.232806	-0.474692	-0.681519	-1.27006	-1.11629	0.249615	-0.502043	-0.229204	-0.848272	-0.193293	1.04586	-0.781331	-0.981045	-0.311453	0.610524	-0.919281	1.56694	-0.74463	-1.23278	-0.791844	-0.571417	-0.886943	-0.789985	-0.748939	-0.382657	1.01095	1.0185	-0.0807431	0.231681	0.114509	-0.474401	0.870056	-1.44928	1.61087	-1.37668	1.74957	-1.42401	-0.796131	-0.820417	-0.913608	-1.05433	1.32463	-0.0676848	-0.744492	-1.21839	1.13267	-0.91791	0.82176
13	N0	-0.524966	-1.05828	-0.155831	-0.479164	-0.522203	0.371222	-0.244002	-0.849438	-0.746533	-0.679234	-1.29601	0.126755	-0.605909	-0.928693	-0.144702	-0.00284877	0.32456	-0.752436	0.204943	-0.728351	-0.37871	-1.01625	0.0419948	0.171972	-0.5625	-0.612708	-0.680132	0.599144	0.184605	1.68707	-2.12296	-0.579517	0.543955	-0.401112	0.153452	-0.58188	-0.576701	-0.724146	-0.982485	0.732555	0.618802	-0.814574	0.617714	-0.751387	0.117412	-0.778874	0.057975	-0.541337
14	N0	0.541347	-0.80784	0.875614	-2.11497	-1.35171	-0.697222	-1.65641	-0.105789	-1.5495	0.144592	0.209269	-1.66798	-1.3627	-0.24054	-1.29942	1.10663	2.29755	-1.2013	-0.550438	-1.1456	-1.11131	-1.58217	-1.10491	-1.20137	-1.13819	0.737054	0.689139	-0.336127	-0.774095	1.80285	-3.54932	0.996378	-0.242382	1.23378	-1.45459	0.54775	-2.0487	-1.16759	-1.90341	0.881657	-0.555007	-0.0995668	3.21598	-1.20097	-0.663276	0.252497	0.0281315	-0.406581
15	N0	-0.366588	-0.387629	-0.223838	-0.131745	-0.10805	1.98117	1.6047	-0.439437	0.148197	-0.579464	0.32252	1.46846	-0.153855	-0.386434	1.86803	-0.0760012	0.131939	0.396271	-0.766811	0.256146	0.65596	-0.121318	0.585623	0.703431	0.795159	-0.581721	-0.584193	0.634512	0.686255	1.03828	-0.88802	-0.518678	-0.999955	-0.295838	0.147674	-0.237607	-0.318818	0.283665	-0.512582	0.176905	0.47336	-0.464518	0.042689	0.395978	-0.647396	-0.612491	-0.965525	0.0210669
16	N0	-0.137081	0.0465663	-0.664064	0.0872599	-0.173931	-0.155537	-0.203765	-0.167191	0.0499672	-0.263136	0.519053	-0.343667	-0.0835506	-0.177325	0.252237	-0.549532	-0.108686	-0.106753	-0.715504	-0.0778349	-0.0374538	0.198364	0.0823857	0.23293	-0.0329401	-0.147939	-0.156908	-0.358702	-0.329595	-0.0988073	0.291202	-0.187783	-0.806858	-0.162829	0.0581401	0.363795	0.0760271	-0.0772182	0.0496405	-0.672	-0.0749237	0.220383	-0.69548	-0.109821	-0.691481	-0.123574	-0.654835	0.281547
17	N0	0.272107	3.03526	1.47866	1.36251	1.18136	-0.672271	1.03505	0.994148	3.04867	0.151741	0.376794	0.899794	2.34415	1.32148	0.0371994	0.689366	-0.621502	3.57795	1.4162	3.82888	1.16256	1.46036	0.785138	0.756953	1.43616	-0.10364	-0.00628051	-0.0671623	0.245877	-1.36156	1.24673	0.0369113	0.742973	-0.19817	0.800352	0.279746	1.4302	3.76083	1.56308	0.501577	-0.361797	0.142802	0.232034	3.58223	1.55959	0.0106758	0.334451	-0.287798
18	N1orN2	0.931786	-0.158959	1.17711	-1.23485	-0.976471	0.0533814	-0.679893	0.449039	-0.991491	0.521427	1.44692	-1.0667	-0.974764	0.350757	0.343757	1.74493	1.31668	-0.869099	-1.0874	-0.841919	-0.866275	-0.198025	-0.782418	-0.65641	-0.884952	0.553139	0.512072	0.0328701	-0.235861	1.06233	-1.57392	0.496178	-1.1568	0.751334	-0.866415	0.676651	-1.22278	-0.860827	-0.786296	0.686551	-0.644245	0.612978	2.15363	-0.869829	-1.12024	0.505323	-0.812121	0.206752
19	N1orN2	-1.49582	-0.287506	-0.199468	0.794016	0.74465	-0.432966	0.157606	-1.28159	1.00809	-1.55107	-1.62946	0.610529	0.962824	-1.16079	0.0739302	-0.432676	-0.565014	0.724535	0.224986	0.609889	0.473275	0.47754	0.504462	0.693952	0.531846	-0.271909	-0.231504	0.198041	0.220856	-0.0262125	0.512961	-0.293331	0.241416	-0.39041	0.718345	-0.282137	0.755668	0.61503	0.895846	0.498191	-0.0764184	0.272924	0.136638	0.722985	0.371962	-0.0977232	-0.104579	-0.331109
20	N1orN2	0.789077	-0.611813	0.111707	-1.99502	-1.42485	1.76652	-0.315104	0.219728	-1.39655	0.410239	1.13821	-0.625641	-1.38899	0.107085	1.31458	-0.0218241	2.36896	-1.00553	-1.03316	-0.962223	-1.30026	0.8949	-1.80292	-2.39357	-1.18615	2.37969	2.43771	1.34996	1.62011	-1.35534	0.468182	2.21651	-1.02371	3.08066	-2.45451	2.6435	-1.88072	-1.00104	-0.777943	-0.535928	-1.51558	1.53485	1.42166	-1.00658	-1.09822	2.64074	0.0242134	0.370984
21	N1orN2	0.337992	1.53716	-1.38358	0.843174	1.90741	-0.551827	0.44755	0.875345	1.67371	0.494464	1.43065	0.0331985	1.73393	1.00881	-0.0104621	-1.4421	-0.932429	1.49276	-0.446814	1.24816	3.92752	-1.35445	3.02373	2.11402	3.59813	-1.84316	-1.70827	-4.1501	-2.6197	-1.72429	1.28832	-1.92073	-0.778986	-0.615624	0.0561936	-0.439257	0.469407	1.42281	-1.47328	-1.47919	2.25566	-1.14733	-1.70154	1.48646	-0.19481	-1.3201	-1.11487	1.13688
22	N1orN2	-0.752846	0.0485768	-1.15005	-0.0808726	0.4906	-0.769109	-0.946994	-0.773275	0.625485	-1.09366	-0.0305057	-0.911459	0.729964	-0.740818	-0.220097	-1.17024	0.606027	0.155567	-0.812779	0.142167	0.00431124	0.443505	0.189767	0.42592	-0.033934	0.198815	0.244815	-1.62529	-1.26615	-0.895453	0.747841	-0.394424	-1.04877	1.3283	-0.595913	2.64865	-0.351325	0.137485	-0.285766	-1.18332	-0.428284	2.80239	-0.971169	0.15982	-0.723348	1.12318	-0.834003	0.934403
23	N1orN2	0.644005	0.299613	0.0154577	-0.522084	0.00206409	-0.393722	-0.226273	0.360067	-0.336614	0.274613	1.27498	-0.577732	0.0176814	0.290557	-0.152857	-0.400254	0.395394	-0.599937	-0.973565	-0.532456	-1.10438	1.27212	-1.10786	-1.17318	-1.12742	0.839696	0.791996	1.02011	0.745867	-0.664642	0.555493	0.882998	-1.08569	0.62846	-0.772863	1.02062	-0.460094	-0.575283	-0.0882565	-0.377392	-0.752632	0.348037	0.100691	-0.599505	-1.00525	0.532667	-0.771069	0.411681
24	N1orN2	-0.242134	-0.667662	-0.135689	-0.914752	-0.78163	0.0153785	-0.409092	-0.580221	-0.648246	-0.533176	0.837719	-0.6326	-0.704852	-0.648267	0.420197	-0.512816	0.887244	-0.644428	-1.31558	-0.661699	-0.784158	0.225066	-0.937377	-0.882041	-0.659903	1.11019	1.13269	0.447189	0.544464	-0.312878	0.144311	1.11188	-1.69897	1.0882	-1.13263	0.976577	-0.914419	-0.68229	-0.218657	-0.262158	-1.1406	1.1994	0.776164	-0.643547	-1.30323	1.17734	-1.06976	2.72107
25	N0	1.26688	0.49669	-0.440786	-0.404322	-0.413309	0.0352044	-0.0110843	1.08868	-0.666437	1.21319	1.45344	-0.418769	-0.457307	1.0037	-0.245955	-0.0294395	0.0793118	-0.724531	-0.524234	-0.728098	-0.455782	-0.813938	-0.236589	-0.115204	-0.500779	-0.186914	-0.228526	0.124831	-0.119956	0.618712	-0.474309	0.0317919	-0.322559	-0.234285	-0.161416	0.0727681	-0.408067	-0.728177	-0.853896	-0.729549	0.265731	-0.643427	-0.772114	-0.725713	-0.594093	-0.505741	-0.523849	-0.32602
26	N0	-1.56283	-0.543245	-0.65158	0.415415	0.511762	-0.57154	-0.424858	-1.45105	0.672245	-1.65305	-0.917113	-0.155311	0.596194	-1.37583	-0.0326764	-0.536104	-0.273241	0.333988	-0.672937	0.327411	-0.309357	1.00499	-0.397341	-0.216899	-0.155614	0.857134	0.929289	0.233327	0.403937	-1.31711	1.07467	0.669398	-0.892438	0.446699	-0.170145	0.726136	0.462	0.298919	1.36215	-0.528784	-1.19251	1.6863	-0.214183	0.33342	-0.60059	1.26459	-0.571992	1.1869
27	N0	0.751072	-0.147962	-1.31034	-0.943116	-0.5541	2.29295	1.00357	0.459516	-0.470883	0.429628	1.64624	0.512868	-0.666476	0.435913	2.11549	-1.2447	0.713695	-0.155086	-1.11639	-0.347192	1.04529	-2.17192	0.384393	0.235188	1.61084	-0.132232	-0.129387	-0.307991	0.283994	0.133519	-0.156741	-0.0569078	-1.37678	0.416981	-1.01665	0.637625	-1.25887	-0.277195	-1.82266	-1.49581	0.100927	-0.458729	-1.41484	-0.158604	-1.03058	-0.447143	-1.15076	0.413038
28	N0	0.343981	-0.300383	0.482102	-0.60478	-0.566723	0.769841	0.249064	0.00967875	-0.623533	0.0537315	0.524942	0.0946115	-0.582249	-0.0584702	0.742839	0.683346	0.553196	-0.607268	-0.66209	-0.599754	-0.758451	0.342362	-0.905258	-0.825105	-0.631899	1.02407	1.02349	0.990526	1.12225	-0.246965	0.244506	0.917294	-0.560988	0.66845	-0.690172	0.854224	-0.539446	-0.621064	0.428479	0.0183483	-1.15162	1.27495	1.00337	-0.605762	-0.679867	1.12984	-0.0630639	-0.0479092
29	N0	-1.22519	-1.00981	-0.164235	0.230936	-0.277627	0.90563	0.956843	-1.13669	0.479667	-1.25966	-0.820716	1.15998	-0.274379	-0.988664	1.39883	-0.690722	-0.122732	0.982795	-0.353524	0.71106	1.54584	-0.320071	0.676598	0.555241	2.23873	-0.156195	-0.124672	-0.0581731	0.522736	0.13935	0.239038	0.00551324	-0.503979	-0.282795	0.222679	-0.41891	0.177549	0.772191	0.340668	0.432822	-0.0528382	-0.1302	0.360039	0.979589	-0.178805	-0.252402	-0.517597	-0.160191
30	N0	-1.20178	-0.799578	-0.440663	0.311374	0.19845	-0.274381	-0.0141864	-1.00673	-0.0197601	-0.848863	-0.794945	0.20937	0.0541493	-1.00888	-0.0596352	-0.30923	-0.434819	-0.162047	-0.413028	-0.217991	-0.396671	0.466098	-0.623494	-0.475971	-0.175284	1.12872	1.17709	0.670934	0.936865	-1.30462	1.03725	0.77435	-0.328584	0.312355	-0.276808	0.975953	0.37087	-0.232448	1.44626	-0.536056	-1.41376	1.8895	-0.199035	-0.160043	-0.357729	1.59713	0.334505	0.176639
31	N0	1.14886	0.466869	-0.920721	-0.198513	-0.129436	-0.70216	-0.662409	1.09728	-0.565141	1.39304	-0.429545	-0.522963	-0.255594	1.01183	-2.04	-1.05664	-0.246429	-0.72927	1.72957	-0.749595	0.713935	-3.67169	1.38336	1.20068	0.161197	-1.75336	-1.76041	-1.79367	-2.05084	1.67828	-1.76066	-1.78494	1.94807	-0.864066	0.537728	-0.963447	-0.404588	-0.684049	-2.10097	-0.859282	2.38615	-1.65136	-1.26633	-0.72614	1.6258	-1.53495	0.510862	-0.633243
32	N0	-0.549417	-0.686774	0.35071	-0.289423	-0.473945	0.152423	-0.486665	-0.729174	-0.255769	-0.75668	0.161721	-0.518202	-0.392022	-0.752678	0.584495	0.542014	0.310352	-0.293407	-0.888238	-0.175431	-0.678992	0.983579	-0.829107	-0.751167	-0.544686	0.985107	1.00066	0.428542	0.560392	-0.699637	0.640391	0.959947	-1.06916	0.55123	-0.499367	0.9557	-0.121618	-0.207021	0.767342	0.343838	-1.09707	1.27931	1.24452	-0.295747	-0.920393	1.13724	-0.611239	1.04711
33	N0	-0.121549	-0.619703	0.377263	-0.492174	-0.568061	-0.342	-0.774218	-0.383672	-0.704875	-0.252236	-0.623707	-0.577084	-0.587975	-0.46497	-0.231046	0.570577	0.26724	-0.743877	0.0275156	-0.700267	-0.648987	-0.198431	-0.313123	-0.224083	-0.783798	-0.298694	-0.378601	0.299106	-0.172964	1.17606	-1.19528	-0.207717	0.33977	-0.317562	-0.00372174	-0.378766	-0.466286	-0.712026	-0.700936	0.979103	0.289393	-0.638195	0.989911	-0.74271	-0.0537712	-0.570102	-0.00160108	-0.519967
34	N0	-0.537907	0.244964	-0.257491	0.733199	0.17164	-0.14613	0.35712	-0.299137	0.771411	-0.454958	-0.439243	0.47025	0.239275	-0.19679	0.447065	0.207156	-0.593348	0.860428	0.171186	0.717262	0.976066	0.153419	1.34995	1.30749	0.613861	-1.41227	-1.40059	-0.381025	-0.665066	0.780297	-0.159788	-1.49695	0.158493	-0.930025	1.08383	-1.13772	0.623498	0.746575	-0.171734	0.422486	1.54992	-1.1607	-0.454657	0.8614	0.284755	-1.18617	-0.495752	-0.484923
35	N0	-1.18735	-1.10799	-0.469859	-0.139986	-0.699322	0.175418	-0.209827	-1.28917	-0.152121	-1.26175	-1.22018	0.138671	-0.622557	-1.26715	0.659199	-0.445892	0.293966	-0.0256111	-0.347549	-0.133818	0.0151563	0.00744851	-0.018178	0.104466	0.155834	-0.0894854	-0.104042	0.171909	0.267812	0.257695	-0.0165921	0.0864381	-0.259692	-0.00192429	-0.128745	-0.18482	-0.193647	-0.128346	-0.262619	0.162896	-0.0263356	-0.372109	0.328154	-0.0252503	-0.297058	-0.33272	-0.361639	-0.325167
36	N0	0.692951	0.587841	-0.253836	0.558305	0.233392	-0.613061	0.142884	0.752432	-0.0721185	0.888321	-0.84242	0.375293	0.18482	0.706508	-0.861205	-0.108268	-0.782263	-0.346125	1.77544	-0.378838	0.642779	-1.54218	1.16982	1.13095	0.234981	-1.44318	-1.45088	-0.240123	-0.672856	1.32466	-0.916684	-1.55379	1.91649	-1.05199	1.13061	-1.21417	0.457603	-0.330072	-0.454369	-0.0660364	1.5727	-1.23036	-0.836842	-0.341892	1.6827	-1.22099	0.781663	-0.623187
37	N0	-0.134358	-1.31855	-0.556827	-2.12565	-1.39355	-0.692747	-1.77033	-0.761242	-1.55479	-0.471901	0.162303	-1.76547	-1.38342	-0.897	-1.32346	-0.434183	2.37271	-1.19928	-1.09699	-1.1429	-1.22496	-0.77977	-1.43676	-1.74715	-1.19311	1.38031	1.38596	-0.154012	-0.421515	0.607361	-1.44286	1.74116	-1.06087	1.9935	-1.88175	1.29034	-2.03724	-1.17129	-1.5136	-0.547582	-0.980489	0.450495	0.930341	-1.19985	-1.17803	0.994917	-0.420716	0.148665
38	N0	0.693456	-0.202875	-0.708259	-0.652804	-0.76195	-0.392532	-0.981751	0.377488	-0.827305	0.548145	0.874321	-1.19922	-0.769571	0.288151	-0.43068	-0.597071	0.481993	-0.786084	-0.6068	-0.69631	-1.11194	1.00227	-1.27633	-1.35264	-1.06303	1.34445	1.32596	0.465034	0.304871	-1.34708	0.873269	1.162	-0.457473	0.862698	-1.1449	0.619368	-0.599295	-0.733885	0.173665	-1.10047	-1.09683	0.947306	-0.710798	-0.78667	-0.679886	1.23019	0.171483	0.0303627
39	N0	0.604596	-0.50236	-0.545674	-1.57542	-1.01885	-0.439682	-0.961167	0.0676084	-1.22478	0.197342	1.4729	-1.34726	-1.08644	-0.0509016	-0.360159	-0.422185	1.52042	-1.05891	-1.37113	-1.04344	-0.76504	-2.13545	-0.626817	-0.551279	-0.794763	0.230062	0.169385	-0.803031	-0.961197	1.73379	-3.05003	0.308547	-1.62698	0.557451	-1.01426	0.183358	-1.69152	-1.04976	-1.79566	-0.62024	-0.212474	-0.425471	0.00667055	-1.05943	-1.39925	-0.165984	-1.13372	0.430772
40	N0	-0.945214	-1.23951	-0.512578	-0.527032	-0.729694	0.275205	-0.439646	-1.20376	-0.544654	-1.11065	-0.611526	-0.25546	-0.704395	-1.24392	0.603176	-0.386586	0.50607	-0.48056	-0.765354	-0.519327	-0.373931	-0.24912	-0.345598	-0.170868	-0.293141	0.303233	0.299128	0.272002	0.283055	0.436983	-0.340175	0.369701	-0.73468	0.263752	-0.43596	-0.120769	-0.553934	-0.522092	-0.265736	-0.133195	-0.522849	0.144117	0.352741	-0.480021	-0.740759	0.145493	-0.534374	-0.139178
41	N0	-1.10977	-0.925747	-0.193077	0.0946734	-0.349943	-0.0567873	-0.0139173	-1.15467	-0.106956	-1.12987	-0.941092	0.250657	-0.27485	-1.15697	0.296427	-0.324861	-0.10217	-0.186441	-0.389076	-0.22223	-0.0358419	-0.0966588	0.0607672	0.260749	-0.00654037	-0.158132	-0.167273	0.34244	0.296603	0.573604	-0.292973	-0.129502	-0.28887	-0.301287	0.288955	-0.185275	0.0930395	-0.216526	0.211704	0.530392	-0.0279576	-0.041388	0.455669	-0.185711	-0.357638	-0.225435	-0.379942	-0.319812
42	N0	1.28488	1.06344	-0.275414	0.588977	0.354984	-0.891363	-0.411088	1.46669	-0.0886867	1.59061	0.903405	-0.652978	0.1987	1.41048	-1.14094	-0.131479	-0.834436	-0.406397	0.635283	-0.359213	0.862974	-1.78238	1.55337	1.39293	0.22206	-1.72053	-1.69536	-2.44371	-2.50424	1.3598	-0.883231	-1.88215	0.912869	-1.10896	1.31616	-1.0302	0.590432	-0.298913	-0.752227	-0.306175	1.86609	-1.51352	-1.03592	-0.4078	0.52863	-1.38192	-0.186572	-0.577719
43	N0	-0.272716	0.22364	-0.806739	0.35483	-0.038848	-0.639977	-0.424729	-0.148248	0.296581	-0.200092	0.191314	-0.466336	0.111872	-0.133434	-0.136093	-0.703002	-0.491635	0.117542	-0.41428	0.0972462	0.124308	0.25788	0.339001	0.452948	0.0720226	-0.549611	-0.562144	-0.749924	-0.742354	-0.144553	0.51856	-0.417596	-0.419	-0.585666	0.305353	-0.685665	0.313162	0.100775	-0.175492	-0.724141	0.487587	-0.914872	-0.987702	0.117848	-0.360049	-0.734659	-0.562797	-0.161369
44	N0	-0.580124	-0.272362	0.261715	0.602807	0.400617	-0.182331	0.148265	-0.449973	0.205199	-0.456205	-1.04281	0.436774	0.368062	-0.448163	0.0289403	0.230761	-0.758507	-0.0436159	0.397343	-0.0686354	0.48716	-0.493584	0.759514	0.824488	0.325163	-0.998226	-1.01436	0.0196572	-0.187379	0.963989	-0.488746	-0.934362	0.600172	-0.908394	1.05662	-1.11122	0.640902	-0.0392381	-0.0272596	1.23201	1.07818	-1.12243	0.0940672	-0.0399968	0.399149	-1.03791	-0.162035	-0.542337
45	N0	1.2821	0.581477	0.516482	-0.143162	-0.363276	0.62141	0.63704	1.10882	-0.480183	1.16655	0.889494	0.369203	-0.407819	1.04516	0.42001	0.720329	-0.0574216	-0.503608	0.172299	-0.439522	-0.357354	-0.0326144	-0.247392	-0.0849287	-0.32615	-0.0526129	-0.102816	0.760883	0.6773	0.457294	-0.130422	-0.064248	0.438188	-0.350831	0.121963	-0.460237	-0.0403967	-0.44413	-0.105296	-0.0146696	-0.118728	-0.220763	-0.0105236	-0.502021	0.0978567	-0.232447	0.243449	-0.478923
46	N0	0.258197	-0.224206	-0.763607	-0.501303	-0.566558	-0.576793	-0.68204	-0.0207532	-0.569915	0.0258756	0.719634	-0.864626	-0.499523	-0.096	-0.293118	-0.93184	0.393451	-0.672663	-0.851562	-0.686103	-0.480702	-0.568463	-0.212442	-0.0915406	-0.591399	-0.201773	-0.234096	-0.398605	-0.653935	0.472107	-0.478251	0.0151376	-0.811763	0.0525185	-0.359854	0.0628877	-0.560597	-0.689018	-1.05984	-0.737815	0.249342	-0.421625	-0.678378	-0.670599	-0.844466	-0.481224	-0.839713	-0.198542
47	N0	0.323465	0.676928	-0.563722	1.11048	1.24207	-0.74725	-0.0484317	0.746973	0.465339	0.885295	0.00291551	-0.0478707	0.864955	0.741286	-0.863327	-0.441599	-1.25854	0.0540356	0.777799	0.109008	0.352652	-0.00321233	0.817754	0.86255	0.0419076	-1.16071	-1.19555	-0.407626	-0.752371	-0.159923	0.722697	-1.27828	0.941107	-1.07038	1.11471	-1.23377	1.15699	0.124796	0.277103	-0.541974	1.26102	-1.16273	-1.21654	0.0564458	0.725212	-1.11695	0.0381556	-0.531628
48	N0	-1.57445	-1.11834	0.517934	0.630918	0.560682	-0.595761	-0.50059	-1.40194	-0.0125649	-1.21515	-2.22243	0.137535	0.377066	-1.42092	-0.710784	0.964977	-0.919792	-0.348326	0.528897	-0.318444	-0.0296821	-0.294532	0.460022	0.584736	-0.281719	-0.949237	-0.99222	0.182228	-0.260437	1.22247	-0.714099	-0.920281	0.786717	-1.04194	1.22731	-1.19555	0.743378	-0.309067	0.264242	2.89802	1.06907	-0.988211	0.989041	-0.347498	0.485206	-0.983201	0.10428	-0.560181
49	N0	-1.1198	0.724938	1.31204	1.3822	1.36914	0.134893	1.62128	-0.560416	2.42588	-1.1875	-1.50313	1.99706	1.72946	-0.17517	0.758657	1.57607	-0.742965	3.24347	1.58199	3.55063	0.0966723	1.82221	-0.0286648	0.193336	0.298236	0.472036	0.53617	1.14467	1.37489	-1.62372	1.33576	0.347104	0.956336	-0.00220786	0.702254	0.503725	1.47906	3.43309	2.30255	1.03355	-0.896052	1.55665	0.942586	3.24538	1.67876	0.906508	1.01737	-0.274561
50	N0	-0.833097	1.89086	-0.839125	2.0836	3.07826	-0.874543	0.556519	0.164075	2.65068	-0.358237	-0.331778	0.633803	3.14765	0.418833	-0.489343	-0.991827	-1.66891	2.43234	0.779952	2.41081	2.90343	0.263961	2.54894	2.07218	2.52428	-1.625	-1.50155	-1.78033	-1.44418	-1.09965	1.29172	-1.64055	0.43809	-1.1825	1.63452	-1.04797	1.99742	2.48841	0.872224	-0.688488	1.7322	-1.06403	-1.44075	2.43083	1.02501	-1.18852	-0.368667	-0.0864091
51	N0	0.0438973	-0.134782	0.761385	0.212338	-0.094808	1.51372	1.63324	0.0710618	0.016193	0.0500813	0.401601	1.47399	-0.191989	0.088913	1.38805	1.52231	-0.334058	0.181136	-0.303159	0.166469	-0.184202	0.706601	-0.355386	-0.279705	0.0386263	0.331066	0.328727	1.13508	1.3887	-0.508837	0.671766	0.569574	-0.295033	-0.21798	0.0174403	-0.478335	0.308071	0.15049	0.502275	0.595761	-0.432894	-0.214568	0.569995	0.181294	-0.285922	0.00539474	-0.251732	-0.24514
52	N0	-0.249143	-0.374647	1.49523	0.247678	0.0377376	0.946085	0.929669	-0.271575	0.0104932	-0.290639	-0.231455	0.968164	-0.0214423	-0.265447	1.02588	0.728492	-0.37665	0.0211666	-0.286347	-0.110727	1.02843	-1.28213	1.02308	1.02259	1.04645	-1.15974	-1.18496	0.103834	0.0445563	1.83372	-1.93046	-1.2432	-0.16971	-0.881189	1.01254	-1.04025	0.180115	-0.0498495	-0.446898	2.96176	1.12017	-1.219	1.5891	0.0211813	-0.210907	-1.08831	-0.618042	-0.466621
53	N0	0.460362	-0.140541	-0.492536	-0.706866	-0.676851	-0.508529	-0.942681	0.138121	-0.711859	0.18861	1.13749	-1.23514	-0.649039	0.0520915	-0.212714	-0.230633	0.633802	-0.763156	-1.1015	-0.791902	-0.561823	-0.879061	-0.37315	-0.174259	-0.600501	0.128255	0.100063	-1.16712	-1.14595	0.864101	-0.988663	0.151366	-1.19587	0.323844	-0.517315	0.311346	-0.857167	-0.795655	-0.873562	-0.622741	-0.29176	0.22158	-0.301914	-0.763879	-1.09071	0.012523	-0.962179	0.271721
54	N0	-0.943346	-0.83749	-0.80697	0.00498931	0.0793567	-0.843689	-1.15037	-1.04696	-0.293897	-0.974231	-0.504626	-0.975951	0.0180471	-1.10379	-0.722678	-0.70325	-0.329675	-0.591787	-0.746883	-0.52991	-1.12579	1.3232	-1.25762	-1.34329	-1.09331	1.24392	1.24174	0.763251	0.566216	-1.67123	1.1267	1.3215	-0.717819	0.379046	-0.678196	0.383963	0.0706831	-0.574013	0.65913	-0.818414	-1.14292	0.970465	-0.607216	-0.592008	-0.769415	1.0922	-0.390384	0.375957
55	N0	1.08425	-0.0473894	-0.304266	-1.18104	-0.972699	-0.530189	-1.07698	0.676432	-1.06393	0.79302	1.62023	-1.50113	-0.972856	0.568471	-0.397856	-0.281471	1.06069	-0.96032	-1.00941	-0.890177	-1.02825	0.146798	-0.936547	-0.954349	-1.07733	0.518641	0.45247	-0.435535	-0.871752	0.606671	-0.798297	0.614393	-1.00522	0.556434	-0.94613	0.646739	-1.16446	-0.9164	-1.12523	-0.675689	-0.497921	-0.134182	-0.128194	-0.960386	-1.09633	0.0910401	-0.72364	-0.0923603
56	N0	-0.870199	2.36823	3.54429	2.74476	4.23229	-0.912104	1.17179	0.520489	3.40069	-0.107317	-0.522946	1.28521	4.14825	0.860579	-0.560627	3.9772	-1.99442	3.45331	1.76962	3.72248	0.34661	1.75123	0.503586	0.746217	0.320105	-0.312595	-0.269874	0.723897	0.649081	-1.58042	1.45723	-0.400804	1.10068	-1.08816	2.09021	-0.98711	2.96128	3.61285	3.40754	2.83138	-0.0652047	0.832734	0.224968	3.4548	1.91228	0.113791	0.451492	0.200206
57	N0	-0.209099	-0.368746	0.225184	0.432531	0.234092	0.556828	0.425917	-0.12009	-0.018871	-0.0163644	-0.754005	0.625446	0.0482118	-0.120493	0.57268	0.618589	-0.617148	-0.0137043	0.483524	0.011731	-0.477817	0.89342	-0.656069	-0.622622	-0.291532	0.65818	0.650606	0.975278	1.1879	-1.1611	1.0434	0.795006	0.657716	-0.319423	0.0173249	-0.608739	0.576127	-0.0151784	1.17121	0.071342	-0.634283	0.175401	-0.0296578	-0.0140898	0.423976	0.393553	1.1197	-0.303332
58	N0	-1.07341	-1.23147	-0.477075	-0.263141	-0.701019	0.598665	0.290918	-1.20366	-0.293216	-1.13993	-0.935159	0.545144	-0.67532	-1.19978	0.903508	-0.348397	0.34577	-0.147404	-0.385565	-0.174644	-0.148356	0.168804	-0.101852	0.0308967	-0.0728182	-0.117117	-0.136723	0.693511	0.691173	0.448139	-0.215551	0.104933	-0.30055	-0.125353	-0.0505787	-0.381647	-0.270577	-0.176828	-0.245811	0.152393	0.0831722	-0.35654	0.295483	-0.145833	-0.390851	-0.347496	-0.370965	-0.34783
59	N0	-0.940543	0.0759123	-0.489647	0.4445	-0.210255	-0.19215	0.411989	-0.785204	0.87792	-1.07461	-0.855623	0.64044	0.250842	-0.664604	0.447401	-0.361919	-0.0737431	0.875705	-0.0146446	0.781661	1.10814	0.11928	0.725762	0.759739	1.43127	-0.34243	-0.289516	-0.277148	0.079317	-0.235799	0.56496	-0.14038	-0.0821768	-0.15743	0.295116	0.0784641	0.355204	0.816071	0.122985	-0.157074	0.165306	-0.116306	-0.2619	0.874406	0.117038	-0.358673	-0.412666	-0.312156
60	N0	-0.702666	-1.29745	-0.604786	-0.963701	-0.770423	0.222097	-0.779726	-1.04999	-0.971013	-0.815172	-0.146774	-0.716317	-0.796482	-1.14537	0.0905724	-0.48577	0.692144	-0.888225	-1.02164	-0.821493	-0.917849	0.074526	-0.864264	-0.790591	-0.923092	0.584328	0.536435	0.617851	0.357433	0.465121	-0.470181	0.622345	-1.0504	0.324167	-0.724393	0.09391	-0.870054	-0.843969	-0.56665	-0.350573	-0.599124	0.120735	0.206807	-0.886194	-1.07914	0.25022	-0.666098	-0.00358463
61	N0	0.230456	-0.543282	-0.981587	-1.27191	-0.647586	-1.00451	-2.06307	0.100221	-1.0062	0.567924	0.0135545	-2.00812	-0.709412	-0.0136416	-2.98137	-0.891078	0.991947	-1.01695	-0.0922054	-0.971439	-0.972031	-0.528491	-0.905201	-0.870325	-1.00187	0.657417	0.628383	-2.58582	-2.23502	0.664323	-0.96501	0.741997	0.269691	0.78181	-1.08012	0.934817	-1.32394	-0.99173	-1.23341	-1.16978	-0.535003	0.262752	-0.838165	-1.01897	-0.272933	0.38642	1.00966	-0.3079
62	N0	-1.30857	-1.09877	-0.982256	0.0919698	-0.365438	0.444918	0.44076	-1.2652	0.147977	-1.2719	-0.758812	0.641215	-0.410542	-1.19201	0.930633	-1.13695	-0.05097	0.366287	-0.773427	0.00191137	2.89821	-3.06981	2.18039	1.77835	3.0262	-1.61825	-1.56626	-1.66332	-1.11004	1.56394	-1.52227	-1.59064	-0.866805	-0.717685	0.59099	-0.685925	-0.359477	0.162602	-1.47848	-0.19755	1.99348	-1.44265	-0.731478	0.363992	-0.56987	-1.38658	-1.09938	-0.0969395
63	N0	-1.44302	0.378487	0.815001	1.25225	0.595537	-0.320477	1.01572	-1.00442	1.58025	-1.35975	-2.84861	1.78644	1.06171	-0.775511	0.259434	0.322095	-0.823233	1.68031	2.27261	1.65338	1.03632	0.818467	0.891215	0.988218	1.14239	-0.583352	-0.535058	0.604454	0.658839	-0.0216312	0.601002	-0.552962	1.94728	-0.691712	1.25817	-0.478935	1.27874	1.65363	1.47927	1.89384	0.250941	-0.287593	0.853311	1.68183	2.38847	-0.465474	1.54337	-0.582465
64	N0	-0.243895	0.796887	0.415424	0.589249	0.423571	-0.34332	0.838135	-0.0696692	1.11922	-0.473157	-0.21917	0.875788	0.88114	0.0320438	0.220937	0.611624	-0.178221	0.917239	0.0946451	0.869168	0.560426	0.636062	0.66967	0.790377	0.534833	-0.587302	-0.557064	0.316477	0.251598	0.249321	0.242525	-0.456235	0.0190904	-0.245268	0.61661	0.211385	0.520984	0.870168	0.339017	0.68924	0.375455	-0.501773	0.36063	0.92298	0.217374	-0.588294	-0.341258	-0.356513
65	N0	-0.117	0.104464	0.413854	0.849404	0.56036	-0.219476	0.106627	0.000587957	0.267673	0.00284102	-1.45642	0.512427	0.414572	0.00447607	-0.176936	0.609935	-0.877805	0.0426501	1.6686	0.146742	-0.570444	1.15609	-0.526252	-0.298221	-0.52143	0.567143	0.572003	1.01572	1.0244	-1.1076	1.08178	0.427911	1.71901	-0.349192	0.424447	-0.232079	0.972676	0.110022	1.80507	0.0599458	-0.889369	1.11366	-0.0912859	0.0429606	1.59764	0.7591	2.64547	-0.524407
66	N0	1.27196	1.40684	-0.318354	0.561002	0.315975	0.861485	2.14682	1.41887	0.683473	1.12236	0.381557	1.97857	0.50715	1.46436	0.954297	-0.177669	-0.50875	0.690062	1.24578	0.567318	1.18601	-0.202562	0.987365	1.03237	1.33432	-0.720115	-0.701225	0.649677	0.718055	-0.00480877	0.410972	-0.863064	1.29086	-0.55497	0.492584	-0.519444	0.41762	0.613466	0.0578046	-0.728144	0.359568	-0.468118	-0.972695	0.689266	1.34506	-0.575474	0.633614	-0.55569
67	N0	-0.246421	-1.107	0.203041	-1.28378	-0.837687	-0.790076	-1.59161	-0.672929	-1.19524	-0.409652	-0.441095	-1.42245	-0.929186	-0.792942	-1.13827	0.383174	0.961295	-1.07311	-0.477642	-0.998991	-1.31105	0.816693	-1.62199	-1.91703	-1.26494	1.84574	1.8465	0.827956	0.589006	-0.603817	0.288732	1.65407	-0.194567	1.21833	-1.45906	0.885901	-1.12149	-1.03713	0.227262	0.024305	-1.41446	1.53124	1.54979	-1.07235	-0.576046	1.92373	0.996508	-0.235186
68	N0	0.178879	-0.677481	-0.937757	-1.10446	-0.558696	-1.11296	-1.99595	-0.161048	-1.05856	0.133622	-0.287453	-1.85841	-0.645467	-0.279578	-2.16065	-0.670924	0.506199	-1.05885	-0.0696488	-1.00069	-0.897588	-1.05364	-0.58567	-0.650635	-1.0445	-0.157229	-0.257024	-2.02612	-2.33068	1.19699	-1.5643	0.03446	0.303937	-0.14659	-0.59972	-0.551812	-1.03305	-1.01584	-1.81096	-0.856921	0.460872	-1.0717	-0.817375	-1.05887	-0.229174	-0.713338	-0.0307734	-0.52914
69	N0	0.331249	-0.522409	0.725719	-1.03447	-1.01905	-0.624636	-0.951108	-0.00212906	-1.10421	0.230739	0.216964	-0.984924	-0.9717	-0.113084	-0.999089	0.945394	0.946359	-0.991333	-0.409175	-0.923689	-1.15247	0.459313	-1.39837	-1.52446	-1.08049	1.61933	1.63589	0.829464	0.780101	-0.495784	0.291223	1.51431	-0.126264	1.27542	-1.1713	1.3549	-0.881842	-0.955641	0.317327	0.0901799	-1.44278	1.37417	1.68488	-0.991073	-0.515097	1.73603	1.02693	-0.264488
70	N0	1.51949	1.34661	0.515733	0.930907	0.987899	-1.04429	-0.703169	1.77457	0.18332	2.05725	0.182922	-0.734491	0.725413	1.72625	-2.15199	0.719522	-1.17016	-0.302372	2.02405	-0.237159	0.428701	-0.765236	1.04365	1.05541	-0.00452493	-1.39697	-1.40162	-1.9452	-2.07839	1.0722	-0.348532	-1.38339	2.08457	-1.20042	1.51319	-1.29414	0.973924	-0.205171	0.0775929	0.327367	1.64397	-1.30899	-0.800094	-0.301432	1.81343	-1.26311	1.01827	-0.594228
71	N0	1.10055	1.39716	-0.319987	0.908216	1.10203	-0.182428	1.23365	1.45394	0.805038	1.21533	2.09806	0.609557	0.96939	1.48354	0.135089	-0.179424	-0.97909	0.523103	-0.379452	0.588617	-0.252732	1.15602	0.166176	0.368134	-0.44612	-0.510561	-0.554484	0.786483	0.455566	-0.580485	0.899245	-0.710854	-0.534725	-0.801025	0.746608	-0.397637	0.959064	0.554225	0.735746	-0.754552	0.27519	-0.387407	-1.12177	0.518502	-0.35685	-0.482914	-0.58798	0.122175
72	N0	-0.46593	0.223935	0.49167	1.00909	1.00041	-0.901416	-0.503827	-0.235126	0.476286	-0.263047	-0.585265	-0.325185	0.951452	-0.235498	-0.838244	0.693638	-1.1023	-0.0302632	0.157842	0.0698414	-0.406178	0.882126	-0.208855	0.000365457	-0.440666	-0.0153728	-0.0194687	0.150182	-0.0359028	-0.374691	0.811994	0.18262	0.292337	-0.738791	0.9335	-0.421538	1.13526	0.0448943	1.55887	0.685107	-0.164068	-0.0465838	-0.0602021	-0.0291514	0.123909	-0.176962	0.253961	-0.226893
73	N0	-1.22666	-0.682838	0.525532	0.630131	-0.0676198	0.585983	0.843849	-1.08143	0.392282	-1.14888	-1.48431	1.23648	0.0744411	-1.00039	0.841191	0.730062	-0.502053	0.473962	0.206468	0.283183	1.3948	-0.840986	1.04767	1.05357	1.63654	-0.784686	-0.759849	0.0855793	0.25872	1.07534	-0.61108	-0.725884	0.318776	-0.716049	1.02875	-0.656641	0.55765	0.350747	0.419677	1.94761	0.588864	-0.687287	1.01789	0.478711	0.353143	-0.734768	-0.0866855	-0.47147
74	N0	-0.221129	-0.346002	0.610615	0.555416	-0.139128	1.39346	1.56813	-0.0113913	0.18476	0.0336052	-0.669816	1.7115	-0.191786	0.0525505	1.37774	0.159746	-0.515214	0.58712	0.709365	0.564643	0.113615	0.782352	0.149986	0.275437	0.194403	-0.36731	-0.401882	1.0514	1.12341	0.0259271	0.440852	-0.288301	0.767513	-0.626954	0.623425	-0.717355	0.623062	0.5514	0.587009	0.851049	0.265423	-0.496367	0.311909	0.589045	0.707071	-0.520845	0.461076	-0.512701
75	N0	-1.56245	-0.59083	-1.08131	0.682811	0.731458	-0.807432	-1.12038	-1.40374	0.54899	-1.47671	-1.58381	-0.643873	0.789975	-1.35746	-0.428548	-1.11861	-0.762968	0.131574	-0.13565	0.122854	0.462165	-0.0970063	0.813774	0.937634	0.251913	-0.872813	-0.840275	-1.7265	-1.57844	0.0923278	0.434346	-0.75719	-0.0562713	-0.689728	0.687316	-0.155703	0.584991	0.144236	-0.0478794	-0.583073	0.965278	-0.425962	-1.04924	0.133942	-0.0651834	-0.75535	-0.533679	-0.380356
76	N0	2.86441	4.25385	0.550907	2.13225	2.82173	-0.884895	1.02393	3.69225	2.34305	3.14903	1.57	0.554046	2.6244	3.81633	-0.537963	0.757359	-1.6611	2.13731	3.43709	2.1142	1.28579	0.894245	1.6688	1.50184	0.80611	-1.59856	-1.57515	-0.539089	-0.842735	-1.04774	1.27938	-1.81638	2.73597	-1.19986	1.68827	-1.12498	2.09777	2.11234	1.08764	-0.433831	1.58064	-1.43594	-1.32421	2.14223	3.51225	-1.28959	1.46581	-0.624386
77	N0	0.498705	-0.443928	-0.482205	-1.15995	-0.828451	-0.862547	-1.48553	0.107961	-1.14263	0.347935	0.611398	-1.61484	-0.91854	-0.00847325	-1.17194	-0.48942	0.862388	-1.04023	-0.78053	-0.992083	-0.982896	-0.631747	-0.783958	-0.825111	-1.07658	0.163949	0.0798811	-0.882788	-1.38841	1.00961	-1.28939	0.380702	-0.607454	0.237857	-0.778298	0.304536	-1.11753	-1.01226	-1.41094	-0.499802	0.00820188	-0.487617	-0.171666	-1.0402	-0.83988	-0.322417	-0.521408	-0.340799
78	N0	-0.198017	-0.424307	1.43319	0.226293	-0.169214	0.805744	1.06934	-0.234579	-0.285537	-0.114477	-0.907939	1.29376	-0.226835	-0.269121	0.446917	1.02332	-0.359174	-0.329451	0.453295	-0.318181	0.164399	-0.605479	0.495526	0.618112	0.0152357	-0.868935	-0.905188	0.822802	0.607418	1.46894	-1.30944	-0.85327	0.712668	-0.807657	0.909601	-0.941766	0.300851	-0.298049	-0.178359	2.62876	0.819983	-1.02896	1.5437	-0.329278	0.390673	-0.923516	0.0637778	-0.553121
79	N0	-0.997599	-0.514767	-0.271606	0.769883	0.483169	-0.548826	-0.125471	-0.784834	0.151617	-0.675386	-1.84146	0.395026	0.354151	-0.787902	-0.480313	-0.760019	-0.936221	-0.135176	0.891801	-0.235224	1.83565	-2.66095	2.38384	1.95858	0.957146	-2.17256	-2.09235	-1.30242	-1.69245	2.33056	-2.74969	-2.32575	1.14234	-1.27096	1.81882	-1.3558	0.604369	-0.125264	-0.767627	1.40452	2.83888	-1.5477	-0.389846	-0.137946	0.913053	-1.56059	-0.206421	-0.615503
80	N0	2.1682	1.0587	2.99008	-0.295155	-0.600069	-0.455504	-0.111576	1.9716	-0.722961	2.20023	0.0633756	-0.126189	-0.627293	1.8857	-1.71321	3.38107	0.224499	-0.719918	2.50188	-0.618785	-1.14243	1.23327	-1.35673	-1.46668	-1.08648	1.53624	1.53812	1.32152	1.41947	-1.25696	0.889155	1.34664	2.49221	0.707163	-0.705505	0.891226	-0.0839578	-0.660735	1.21569	0.5341	-1.33055	1.60383	1.66008	-0.719713	2.25532	1.80054	6.80796	-0.549708
81	N0	0.0339357	0.952114	-1.01351	0.11177	-0.527331	-0.140984	0.62962	0.230538	0.946921	-0.106826	0.869921	0.367489	0.103574	0.334606	0.536516	-0.768707	0.33323	1.02003	-0.514688	0.744112	1.82245	-0.49085	1.0571	0.972808	2.36329	-0.0948618	-0.00114292	-1.25462	-0.402609	-0.999565	0.868455	-0.282459	-0.748124	0.467949	-0.423711	1.05106	-0.167077	0.819443	-0.288365	-1.24005	-0.359254	0.691567	-1.11319	1.02149	-0.331794	0.233714	-0.779188	0.458737
82	N0	-1.68446	0.23619	-0.263127	1.37709	1.12334	-0.422566	0.207757	-1.13817	1.63392	-1.45895	-1.34609	0.579705	1.43723	-0.903784	0.149038	-0.118262	-1.12986	1.66482	0.282764	1.62198	0.839669	0.924913	0.615797	0.724662	1.07018	-0.0724047	0.00767089	-0.140057	0.121606	-1.04602	1.16433	-0.0318934	0.0435021	-0.622555	0.935433	-0.494591	1.41893	1.61242	1.8471	0.0876498	-0.355273	0.391906	-0.440204	1.6619	0.43754	0.0907129	-0.203202	-0.0629194
83	N0	0.574144	0.426174	-0.314813	0.628745	0.17601	-0.645679	-0.293929	0.629377	-0.0344472	0.813661	-1.13689	0.033584	0.0974432	0.594641	-1.37227	-0.173858	-0.746277	-0.246081	2.06632	-0.286881	0.623645	-1.21575	1.1187	1.09883	0.254261	-1.42805	-1.45134	-0.579951	-0.935707	1.08765	-0.533751	-1.54282	2.12798	-1.02214	1.09216	-1.17201	0.523793	-0.242359	-0.432994	-0.0579995	1.68997	-1.30927	-0.838393	-0.243902	1.98915	-1.26192	0.852657	-0.589206
84	N1orN2	-0.647225	-1.02528	-1.28878	-0.22535	-0.599136	0.940211	0.01084	-0.764297	-0.553744	-0.567725	-1.16807	0.338423	-0.637742	-0.808405	0.562207	-1.41649	0.127557	-0.464448	0.125233	-0.528988	0.406628	-1.80094	0.394094	0.411906	0.519447	-0.592071	-0.627965	0.0492467	0.0836867	0.160583	0.0856238	-0.597323	0.419951	-0.244097	-0.200665	-0.109864	-0.458476	-0.488123	-1.23717	-1.21785	0.542003	-0.813967	-1.26648	-0.460017	0.114251	-0.758717	-0.114702	-0.506738
85	N1orN2	-0.529533	-0.854504	1.17754	-0.395591	-0.014945	-0.828138	-1.04574	-0.706134	-0.661088	-0.494082	-0.111925	-0.984532	-0.199622	-0.79798	-1.04725	1.43139	-0.19522	-0.846032	-0.732372	-0.74994	-0.690486	-0.272601	-0.22774	-0.192854	-0.91037	-0.525062	-0.62239	-0.241427	-0.917643	1.52266	-1.65582	-0.491172	-0.612204	-0.72399	0.368673	-1.06328	-0.20076	-0.762281	-0.620228	2.75461	0.579409	-0.814279	1.9858	-0.847123	-0.813259	-0.733692	-0.701735	-0.315767
86	N1orN2	0.340289	-0.0199362	1.5412	0.147795	-0.111815	0.540445	1.18145	0.273071	-0.3394	0.385325	0.307434	1.0615	-0.194474	0.220471	0.205939	1.11627	-0.372855	-0.446875	-0.216741	-0.397286	-0.436659	0.203073	-0.207283	-0.0364401	-0.489952	-0.201338	-0.246602	1.13206	1.04008	0.679207	-0.259329	-0.0765296	-0.0242008	-0.594821	0.490697	-0.928789	0.257932	-0.407755	0.335798	1.70482	0.154805	-0.40784	1.19995	-0.445305	-0.261875	-0.411644	-0.206633	-0.34961
87	N1orN2	-0.724052	0.253555	-0.730869	1.0618	0.868864	-0.555055	-0.187925	0.0505291	0.714455	0.258221	-0.483383	-0.0468802	0.632843	0.129997	-0.3408	-0.621391	-0.87155	0.744028	0.630932	0.83577	-0.192565	1.23616	-0.234508	-0.165873	-0.0873452	0.407781	0.439652	0.240625	0.357945	-2.16171	1.38251	0.44798	0.619391	-0.288976	0.182805	-0.154628	1.08287	0.79616	1.29655	-0.959321	-0.560489	0.607408	-1.09663	0.739954	0.634344	0.438062	0.92	-0.102501
88	N1orN2	0.554936	0.747668	-0.679291	0.231246	-0.203008	0.415679	1.10407	0.629523	0.726689	0.350416	1.13916	0.752847	-0.0774296	0.734451	1.06234	-0.794523	-0.0685902	1.13466	-0.410906	0.930359	1.49016	-0.0408028	0.97244	0.85736	1.8808	-0.615423	-0.570785	-0.465819	-0.0373833	-0.250115	0.519462	-0.283767	-0.661756	-0.28826	0.0275451	-0.547181	0.0485356	0.980811	-0.55816	-0.816703	0.593921	-0.809994	-0.961346	1.12825	-0.233155	-0.783927	-0.857784	0.247688
89	N1orN2	0.759242	0.69945	-0.0631156	0.767564	0.704196	0.948999	1.72813	0.99785	0.323302	0.983914	0.848673	1.44068	0.449135	1.0093	0.793505	0.0968815	-0.950001	0.261766	0.234371	0.342799	-0.815404	1.57153	-1.06244	-1.21257	-0.650212	1.03755	1.00994	1.48274	1.88118	-2.50415	1.44766	1.10621	0.302433	-0.294066	-0.164308	-0.530699	0.968283	0.285705	1.52248	-0.71532	-0.824135	0.518414	-0.851657	0.263428	0.177288	0.794733	0.750607	-0.180209
90	N1orN2	0.574797	0.265801	0.0792092	0.323389	0.150291	-0.621365	-0.174212	0.573893	-0.2765	0.728008	-0.227895	-0.105277	0.0162531	0.511875	-0.848201	-0.262366	-0.630407	-0.516268	0.659964	-0.488098	0.565994	-1.82137	1.15662	1.15709	0.119725	-1.4303	-1.44773	-0.816448	-1.22359	1.75151	-1.65445	-1.68692	0.961612	-1.05232	1.17327	-1.14546	0.334452	-0.439809	-0.529097	0.399856	1.38914	-1.20601	-0.449091	-0.516456	0.556409	-1.16652	0.0422274	-0.581156
91	N1orN2	0.132833	-0.425731	-0.44954	-0.352272	-0.149337	-0.837127	-1.34298	-0.111556	-0.672768	0.0599407	-0.72525	-1.10114	-0.343428	-0.202627	-1.22655	-0.682368	-0.0316222	-0.817142	0.364917	-0.749831	-0.631888	-0.442577	-0.229282	-0.141367	-0.81356	-0.402975	-0.472509	-0.656779	-1.14728	0.948959	-0.797228	-0.262476	0.712297	-0.470267	0.103657	-0.399348	-0.294286	-0.758926	-0.741758	-0.2259	0.485764	-0.688477	-0.405774	-0.819195	0.225858	-0.69942	0.292531	-0.549669
92	N1orN2	1.67997	0.142119	0.852565	-1.53352	-1.29892	6.27485	1.82427	1.16072	-1.17297	1.30641	0.479945	1.63758	-1.32045	1.0825	3.30552	1.08184	1.96852	-0.652664	0.58727	-0.670899	-0.857005	0.370006	-1.22356	-1.43439	-0.650505	1.38449	1.40453	1.54293	2.06327	-0.187496	-0.240455	1.60549	0.913397	1.90688	-1.67661	1.57966	-1.54506	-0.695213	-0.768254	-0.223339	-1.135	0.876436	1.49632	-0.653646	0.474952	1.1776	2.18972	-0.488972
93	N1orN2	-1.21651	-1.1462	-0.17475	0.170736	0.137373	0.477322	0.104902	-1.1381	-0.0868606	-1.0261	-0.616221	0.274896	-0.0547576	-1.12936	0.692054	-0.0231988	-0.459118	-0.0991715	-0.580398	-0.0505687	-0.31473	0.622045	-0.424376	-0.301575	-0.142529	0.384454	0.36763	0.664228	0.799533	-0.485191	0.660887	0.444243	-0.616082	-0.339113	0.0134567	-0.602337	0.280687	-0.0662756	0.705102	0.263787	-0.555146	0.102024	0.220509	-0.10113	-0.588989	0.20281	-0.483981	0.051368
94	N1orN2	-1.24912	1.29292	-0.080772	1.44829	4.00516	-1.11088	-0.612262	-0.469709	2.57382	-1.11929	-0.236483	-0.52844	3.66895	-0.245172	-0.763017	0.0778889	-1.15084	1.87543	0.0388964	2.20242	-0.637256	1.96263	-0.66351	-0.417719	-0.553909	0.910378	0.918037	0.291885	0.304571	-2.34795	1.47687	0.43611	-0.470722	0.026791	0.444664	0.559586	1.58256	2.09084	2.51881	-0.412177	-1.17907	2.75446	-0.563454	1.87947	0.0921694	1.6542	-0.105175	6.58078
95	N1orN2	2.20176	1.44498	4.02039	0.367695	0.151141	0.256282	0.837447	2.28219	-0.215544	2.36995	1.61173	0.361161	-0.0305871	2.23046	0.0495332	2.86823	-0.615127	-0.315002	0.742694	-0.19335	-0.221166	0.27299	0.175715	0.322335	-0.395171	-0.656496	-0.709948	0.58079	0.229091	0.993606	-0.550769	-0.635703	0.966609	-0.874497	0.889714	-1.11252	0.504235	-0.198925	0.248375	2.39395	0.569394	-0.846725	1.24919	-0.315933	0.589746	-0.766466	0.495353	-0.559666
96	N1orN2	0.713869	-0.225044	1.98314	-0.876987	-0.874307	-0.0957354	-0.232733	0.303841	-0.948322	0.436342	0.267354	-0.301155	-0.869921	0.205189	-0.18813	2.29794	0.825707	-0.875109	-0.272418	-0.83109	-0.96292	0.169987	-1.10636	-1.07248	-0.882952	1.21107	1.21474	0.989833	1.01953	0.0282301	-0.0755671	1.1396	0.0203308	0.861975	-0.826852	0.917858	-0.732368	-0.855734	0.359603	1.07704	-1.2008	1.27623	2.94758	-0.874918	-0.342789	1.34075	0.864645	-0.246394
97	N1orN2	0.559363	-0.00248591	-0.664972	-0.205984	-0.422004	0.52776	0.27283	0.413787	-0.481451	0.529765	-0.103441	0.294097	-0.502091	0.35984	0.454279	-0.550509	0.0595044	-0.449223	0.441517	-0.509444	0.0544584	-1.03728	0.253558	0.417773	0.0192331	-0.4271	-0.443044	0.284683	0.148168	0.736637	-0.536131	-0.395301	0.743618	-0.344616	0.0114599	-0.537381	-0.368959	-0.48879	-0.655584	-0.753931	0.310679	-0.517928	-0.811452	-0.449089	0.386258	-0.544236	0.374379	-0.542021
98	N1orN2	-0.164103	-0.768522	-0.722836	-0.629767	-0.802476	-0.485098	-1.17846	-0.360685	-0.889106	-0.118803	-0.0765995	-1.1234	-0.820154	-0.453041	-0.750054	-0.612751	0.567511	-0.836926	-0.605222	-0.827827	-0.884793	-0.0711344	-0.780626	-0.6903	-0.910613	0.435596	0.399906	-0.0780734	-0.393235	0.256242	-0.197956	0.645091	-0.409467	0.445652	-0.665877	0.71246	-0.735161	-0.84825	-0.545734	-0.731342	-0.394233	-0.0103484	-0.425036	-0.837748	-0.655266	0.0462685	-0.235411	-0.299163
99	N1orN2	0.162476	0.618958	1.39535	0.929124	0.358583	-0.116744	0.611387	0.383746	0.497583	0.28883	-0.212829	0.653718	0.410701	0.413949	0.160022	1.14651	-0.824459	0.350216	0.539249	0.335702	-0.160025	0.862272	0.0137534	0.194126	-0.167318	-0.288285	-0.323	0.720938	0.611891	-0.202684	0.680648	-0.194128	0.643208	-0.669898	0.837658	-0.85973	0.98273	0.315206	1.09984	1.36159	0.139957	-0.524892	0.519573	0.349024	0.558464	-0.48136	0.227873	-0.470192
100	N1orN2	-1.41649	0.186451	-1.24627	1.43064	1.90611	-0.866613	-0.52825	-0.85897	1.4549	-1.0482	-1.09242	-0.206549	1.89437	-0.724503	-0.523572	-1.31523	-1.34675	0.96651	0.0722061	0.944671	1.81096	-0.234504	1.9459	1.72232	1.3571	-1.42635	-1.34467	-2.55839	-2.07219	-0.805384	1.08385	-1.6513	-0.00943838	-0.997899	1.07027	-0.740711	1.26827	1.01242	0.207575	-1.05062	1.36362	-0.662949	-1.50109	0.960688	0.221448	-0.953499	-0.639543	-0.0641922
101	N1orN2	-0.0451992	-0.821042	-0.83148	-1.13213	-0.785441	-0.958982	-1.78002	-0.383013	-1.11298	-0.134603	0.584434	-1.89338	-0.821061	-0.499599	-1.26579	-0.729614	0.729315	-1.04292	-1.00216	-0.961123	-1.1625	0.332694	-1.29732	-1.4244	-1.14245	1.257	1.24435	-0.76473	-0.938412	-0.389223	0.183251	1.29181	-0.968758	0.844194	-1.19228	1.44927	-1.00246	-0.992336	-0.499875	-0.99383	-0.988339	0.97299	-0.514981	-1.04062	-1.08983	1.09822	-0.356799	0.125908
102	N1orN2	-1.29533	-0.0739722	-0.115611	1.0346	0.323415	0.523827	1.61359	-0.877176	1.20489	-1.07386	-1.65794	2.03304	0.412996	-0.637801	1.0224	-0.417118	-0.783958	1.82289	0.934386	1.65571	1.84697	0.331928	1.32165	1.24722	2.11322	-0.90145	-0.866621	0.384125	0.546342	0.194546	0.456527	-0.902625	0.766249	-0.863219	1.12055	-0.876195	0.981434	1.70085	0.805559	0.608666	0.705821	-0.744013	-0.209229	1.82208	1.11375	-0.801879	0.135281	-0.50099
103	N1orN2	-0.645478	-0.303175	-0.885296	0.602666	0.232083	-0.827699	-0.837845	-0.328952	-0.00269605	-0.187582	-0.403397	-0.700743	0.19711	-0.358658	-0.937366	-0.787501	-0.811838	-0.29772	-0.138406	-0.258563	-0.077722	-0.0806364	0.256992	0.401208	-0.208655	-0.629549	-0.67692	-0.973659	-1.08688	-0.0911056	0.549629	-0.672307	0.0385694	-0.740578	0.583676	-0.618648	0.580757	-0.253924	0.0842149	-0.708587	0.68811	-0.902403	-1.10466	-0.300662	-0.200469	-0.805591	-0.318186	-0.281331
104	N1orN2	-0.238117	0.368971	0.252675	1.20418	0.872712	1.23805	2.42881	0.255297	1.26839	0.0500531	0.0492861	2.3458	0.716793	0.479268	1.50648	0.436562	-1.08969	2.17587	0.517706	2.02852	1.64771	0.660542	1.46749	1.37079	1.66326	-1.30762	-1.29056	0.609637	0.573263	0.439138	0.314674	-1.39898	0.223709	-1.10077	1.4127	-1.20665	1.16406	2.0497	0.537683	0.608131	1.30201	-1.05624	-0.544714	2.17139	0.713651	-1.08549	-0.322523	-0.405553
105	N1orN2	1.1705	0.908297	-0.639548	0.51316	0.526826	-0.868325	-0.605774	1.34108	-0.0578955	1.47822	1.35016	-0.967529	0.314418	1.28532	-1.08859	-0.888027	-0.866927	-0.408452	-0.0709412	-0.41952	-0.0798129	-0.499222	0.424528	0.40473	-0.366558	-0.992971	-1.05767	-1.56657	-1.7536	0.224079	0.248947	-1.00872	0.162436	-0.898207	0.648521	-1.03742	0.523025	-0.409426	-0.406355	-0.79878	1.22537	-1.22059	-1.24734	-0.409661	-0.126969	-1.11821	-0.399825	-0.375231
106	N1orN2	1.19243	0.254084	-0.390511	-0.852652	-0.486783	1.21643	0.264458	0.890623	-0.794236	0.987526	1.87203	-0.268579	-0.606163	0.805502	0.908386	-0.546021	0.44868	-0.730933	-0.922743	-0.661416	-0.767155	0.205268	-0.838432	-0.755247	-0.679643	0.781835	0.744645	0.762901	0.763109	-0.11531	0.136214	0.612277	-0.941769	0.261477	-0.773256	0.178128	-0.678982	-0.681074	-0.266402	-0.892717	-0.776741	0.4316	-0.542109	-0.733746	-0.998057	0.665842	-0.514354	0.15647
107	N1orN2	1.19345	0.72788	0.178238	0.224751	-0.0351877	0.0402476	0.609613	1.25032	-0.237564	1.33177	1.40729	0.197205	-0.130636	1.20096	0.0602042	0.0387288	-0.482718	-0.346062	-0.0906708	-0.247772	-0.419316	0.474925	-0.210619	-0.0401863	-0.468868	-0.0936984	-0.140095	0.68472	0.489809	-0.0716041	0.400028	-0.164969	0.0876062	-0.537788	0.289646	-0.516596	0.315884	-0.262454	0.447802	-0.348194	-0.0754101	-0.0833996	-0.544913	-0.347663	-0.198381	-0.194831	0.0671408	-0.394461
108	N1orN2	-1.46934	-0.534645	-0.122011	1.19915	0.900161	-0.469126	0.0706091	-1.01785	0.680015	-0.96024	-1.43352	0.471006	0.80827	-0.94234	-0.195031	0.0335283	-1.21643	0.446722	0.131358	0.361476	1.31994	-0.594413	1.49193	1.43204	1.08383	-1.42474	-1.40926	-0.724539	-0.81247	1.00687	-0.230262	-1.51283	0.211806	-1.18225	1.66847	-1.34407	1.18978	0.422178	0.47652	1.22546	1.4571	-1.26381	-0.335164	0.444766	0.245115	-1.20805	-0.39964	-0.437116
109	N1orN2	3.13707	2.98687	2.68445	0.96774	0.476185	0.171804	2.15276	3.37567	1.0102	2.983	1.85946	1.56947	0.53486	3.43318	0.640604	2.68606	-0.700298	1.17233	2.17328	1.07958	1.00766	0.461921	0.637976	0.679918	1.33129	-0.235055	-0.19525	0.513894	0.752294	-0.384947	0.775968	-0.161525	1.97205	-0.554375	0.799696	-0.522931	0.959918	1.09811	1.28481	0.39216	-0.0337698	0.0960446	-0.0574315	1.17249	2.2476	-0.175644	1.99388	-0.573493
110	N1orN2	2.53402	3.0728	2.81336	1.92718	1.14865	-0.211893	2.35235	3.39771	1.3376	3.22828	1.19401	1.95018	1.04884	3.48283	-0.0256572	1.90946	-1.49034	1.54424	3.55825	1.68789	0.626173	1.09262	0.809451	0.887024	0.530371	-0.924455	-0.943516	0.878801	0.785084	-0.702732	1.12793	-1.00677	2.88052	-1.1141	1.69104	-1.04764	2.02832	1.6642	1.84208	0.871744	0.834662	-0.807176	-0.535427	1.54456	3.39163	-0.847358	2.28483	-0.619187
111	N1orN2	-1.00859	-0.360883	-0.95573	0.858743	0.718387	-0.823882	-0.778942	-0.743313	0.290782	-0.67058	-1.16186	-0.430606	0.552424	-0.741071	-0.766292	-0.863264	-1.0006	-0.0855937	0.256894	0.0273227	-0.106953	0.457656	0.0297195	0.199946	-0.109125	-0.0894045	-0.0802374	-0.332912	-0.331591	-1.03253	1.09082	-0.0167753	0.417799	-0.619264	0.520289	-0.669081	1.00787	0.0204446	0.940632	-0.868281	-0.146486	0.0496072	-1.13942	-0.0872699	0.234794	-0.144041	0.199916	-0.363456
112	N1orN2	-0.857962	-0.408961	0.761616	0.287571	-0.0245097	0.737833	1.36139	-0.767623	0.477326	-0.872571	-0.947995	1.58873	0.0810897	-0.672998	1.0893	0.445412	-0.226749	0.666585	0.168904	0.651118	0.0872424	0.864761	-0.0897157	0.0819595	0.315867	0.294675	0.320594	1.01313	1.24404	-0.27475	0.517447	0.335791	0.159822	-0.0907729	0.161305	-0.171315	0.335429	0.633419	0.875967	1.09821	-0.583752	0.533142	1.2734	0.666978	0.238184	0.318492	0.230281	-0.333399
113	N1orN2	0.0688311	-0.336466	-0.894443	-0.309164	-0.712694	0.201802	-0.0117941	-0.017928	-0.531211	0.0998826	0.57652	-0.173295	-0.571861	-0.0759405	0.220137	-0.867466	0.212494	-0.518021	-0.651859	-0.520903	-0.728644	0.474895	-0.598657	-0.548005	-0.757569	0.209253	0.160684	0.767662	0.561637	-0.431016	0.448343	0.405134	-0.571614	0.179858	-0.514691	0.193284	-0.33952	-0.543289	-0.504812	-0.992564	-0.176919	-0.162046	-0.900875	-0.519623	-0.677521	-0.159101	-0.469844	-0.228242
114	N1orN2	-0.246409	-0.672204	-0.105268	-0.492167	-0.81485	1.42416	0.980998	-0.441407	-0.224601	-0.504988	0.0166157	0.948393	-0.744887	-0.423834	1.63283	0.051539	0.757292	0.0922662	-0.546477	-0.0333042	0.290026	-0.181539	-0.378247	-0.481018	0.868764	0.917213	0.964842	0.624227	1.21331	-0.61989	0.536132	0.988912	-0.560809	0.864322	-0.769079	1.05192	-0.466654	-0.0160644	0.202816	-0.307956	-1.06906	0.845046	0.577632	0.0918791	-0.48147	0.88989	-0.179174	-0.0374328
Validation set
Number	LNM	original_firstorder_10Percentile	original_firstorder_90Percentile	original_firstorder_Energy	original_firstorder_Entropy	original_firstorder_InterquartileRange	original_firstorder_Kurtosis	original_firstorder_Maximum	original_firstorder_Mean	original_firstorder_MeanAbsoluteDeviation	original_firstorder_Median	original_firstorder_Minimum	original_firstorder_Range	original_firstorder_RobustMeanAbsoluteDeviation	original_firstorder_RootMeanSquared	original_firstorder_Skewness	original_firstorder_TotalEnergy	original_firstorder_Uniformity	original_firstorder_Variance	original_glcm_Autocorrelation	original_glcm_ClusterTendency	original_glcm_Contrast	original_glcm_Correlation	original_glcm_DifferenceAverage	original_glcm_DifferenceEntropy	original_glcm_DifferenceVariance	original_glcm_Id	original_glcm_Idm	original_glcm_Idmn	original_glcm_Idn	original_glcm_Imc1	original_glcm_Imc2	original_glcm_InverseVariance	original_glcm_JointAverage	original_glcm_JointEnergy	original_glcm_JointEntropy	original_glcm_MaximumProbability	original_glcm_SumEntropy	original_glcm_SumSquares	original_gldm_DependenceEntropy	original_gldm_DependenceNonUniformity	original_gldm_DependenceNonUniformityNormalized	original_gldm_DependenceVariance	original_gldm_GrayLevelNonUniformity	original_gldm_GrayLevelVariance	original_gldm_HighGrayLevelEmphasis	original_gldm_LargeDependenceEmphasis	original_gldm_LargeDependenceHighGrayLevelEmphasis	original_gldm_LargeDependenceLowGrayLevelEmphasis
115	N0	0.163587	1.90441	-0.852063	1.06053	1.58956	-1.11094	0.026173	0.842571	1.7192	0.327151	0.964347	-0.210051	1.86769	0.973742	-0.514733	-1.12133	-1.11256	1.39093	-0.0582106	1.17979	3.63086	-1.59164	3.0172	2.18367	3.1966	-1.86769	-1.72677	-4.74765	-3.33632	-1.97211	1.2805	-1.94075	-0.132398	-0.810584	0.303454	-0.697169	0.690863	1.3518	-1.39989	-1.02879	2.51276	-1.47108	-1.67151	1.39314	0.138518	-1.31445	-0.860185	-0.293477
116	N0	0.763558	0.643968	-0.772219	-0.349195	-0.210671	-0.751819	-0.4671	0.526207	-0.0972619	0.392767	1.91848	-0.87288	-0.039368	0.468245	-0.169085	-1.13788	0.100886	-0.341818	-0.811335	-0.422725	-0.104038	-0.630033	0.0175027	0.14654	-0.0762772	-0.0111211	0.00279489	-1.25844	-1.04742	-0.663422	0.502458	0.0396667	-1.20375	0.185969	-0.634353	0.0875282	-0.488542	-0.409071	-1.05307	-1.07183	-0.151597	0.344832	-1.36287	-0.347365	-0.791913	-0.0355737	-1.23628	2.65482
117	N0	0.729146	-0.648788	0.0185353	-1.61187	-1.13963	2.15923	-0.18914	0.0108931	-0.966849	0.0542824	1.26974	-0.472538	-1.17063	-0.0720464	1.96936	-0.0859129	2.53926	-0.658399	-0.763487	-0.67197	-0.66301	0.00351348	-0.796699	-0.80014	-0.54938	0.822564	0.828154	0.422927	0.599022	0.746031	-1.3129	1.03475	-1.00298	1.85972	-1.35442	1.14577	-1.61795	-0.681567	-1.52611	-0.185007	-0.789254	0.287413	1.83113	-0.658793	-0.794279	0.518183	-0.864426	0.289098
118	N0	0.756802	0.18632	-0.323874	-0.115341	-0.142246	-0.46016	-0.550676	0.540219	-0.361325	0.59067	1.24857	-0.784275	-0.224114	0.459626	-0.212484	-0.511245	-0.187855	-0.526639	-0.507231	-0.483295	-0.59896	0.407178	-0.4468	-0.378672	-0.652088	0.0942867	0.0526536	-0.0627258	-0.294328	-0.191396	0.290228	0.276829	-0.531708	-0.308726	-0.11328	-0.32071	-0.00736185	-0.497878	-0.0639711	-0.526225	-0.108056	-0.40246	-0.698129	-0.525354	-0.544712	-0.240554	-0.558281	-0.096729
119	N0	-1.69914	-1.49296	-0.487431	-0.547314	-0.719304	0.115723	-0.710334	-1.8602	-0.484367	-1.73248	-0.836392	-0.420466	-0.639324	-1.8566	0.519364	-0.758709	0.70927	-0.480598	-0.697973	-0.494318	-0.784891	0.883255	-0.866762	-0.81237	-0.731945	0.935591	0.945373	0.666085	0.752369	-0.819246	0.521399	0.969232	-0.918806	0.963492	-0.84121	0.967542	-0.529249	-0.52007	0.0352716	-0.357441	-1.03404	1.08321	0.50102	-0.47921	-0.710359	0.841293	-0.7502	0.702868
120	N0	-1.02221	-1.54077	-0.259242	-1.22797	-0.804815	0.290777	-0.681572	-1.53156	-1.03869	-1.30994	-0.71488	-0.424616	-0.864198	-1.61563	0.0721562	-0.514458	1.3615	-0.94436	-0.670327	-0.900746	-1.02416	0.502145	-1.3026	-1.44605	-0.962765	1.63576	1.6563	1.01262	1.28012	-0.522997	0.13516	1.39028	-0.730981	1.78909	-1.30947	1.55872	-1.11251	-0.922129	0.0939071	-0.265118	-1.46891	2.07588	1.64632	-0.944662	-0.726961	1.90356	-0.0674551	0.263082
121	N0	0.163768	0.460939	-0.280752	0.23101	0.0831566	0.197201	0.807964	0.124067	0.364847	-0.138415	-0.00828218	0.710106	0.175128	0.151134	0.560757	-0.155001	-0.153565	0.23726	-0.0562471	0.124601	0.859365	-0.807701	0.613561	0.730415	1.17738	-0.424298	-0.402035	-0.0659675	0.167884	0.29246	0.140325	-0.337704	0.0751679	-0.335161	0.304796	-0.139274	0.209362	0.172703	-0.229553	-0.319916	0.169907	-0.636115	-0.511051	0.236643	-0.00336263	-0.508779	-0.347303	-0.398943
122	N0	-1.45552	1.55105	0.270912	2.28135	2.89631	-0.863575	1.10524	0.155149	2.63426	-0.289571	-1.40921	1.30911	2.82574	0.490653	-0.456517	0.697938	-1.89376	2.77012	1.34576	3.00868	0.520647	1.59963	0.911196	0.996662	0.256679	-1.07129	-1.0782	0.511706	0.284446	-1.05074	1.21707	-1.2265	1.23016	-1.29023	1.85475	-1.17195	2.36425	2.89767	2.27991	0.631815	0.978024	-0.850027	-0.924882	2.77268	1.4555	-0.83928	0.718807	-0.457642
123	N0	0.0555991	0.104249	-0.274118	-0.269685	-0.35858	-0.178986	-0.0653629	-0.174228	0.0224217	-0.350809	0.888113	-0.271856	-0.228481	-0.180583	0.425417	-0.0483348	0.50679	-0.11339	-0.635105	-0.117204	-0.537026	0.95794	-0.49021	-0.32003	-0.49712	0.387227	0.389888	0.415834	0.409861	-0.441648	0.433074	0.583932	-0.903231	0.445133	-0.407715	0.415461	-0.25883	-0.145384	-0.0995325	-0.409108	-0.512416	0.191861	-0.0533881	-0.11563	-0.637703	0.124135	-0.932024	0.58328
124	N1orN2	-0.660976	-0.683837	-0.433315	0.077349	-0.292756	1.11384	0.64445	-0.698947	-0.179073	-0.65625	-0.384064	0.657591	-0.314093	-0.692112	0.864007	-0.390881	-0.134651	-0.161417	-0.375459	-0.225063	-0.0559552	-0.15337	-0.345173	-0.27792	0.27727	0.496228	0.498759	0.584697	0.997301	-0.809912	0.70346	0.533559	-0.358118	-0.0266244	-0.219621	-0.0244407	0.0624671	-0.217829	0.616128	-0.534357	-0.696673	0.260923	-0.472148	-0.162455	-0.348849	0.333611	-0.111563	0.110399
125	N1orN2	1.48668	0.769132	-0.258826	0.163837	0.000138343	2.05902	1.73559	1.31186	-0.0704008	1.23025	-0.414342	1.62119	-0.0288787	1.25892	1.14955	-0.1211	-0.441118	-0.0937655	1.05362	-0.125061	0.538263	-0.949167	0.502019	0.592463	0.695393	-0.588905	-0.603624	0.657042	0.802728	0.499534	-0.0526154	-0.552367	1.42611	-0.651287	0.352157	-0.562664	0.130268	-0.0852276	-0.370279	-0.48256	0.542414	-0.536681	-0.908329	-0.0960628	1.0737	-0.613352	1.24625	-0.551167
126	N1orN2	-0.257997	-0.772919	0.00682013	-0.486407	-0.349445	-0.244068	-0.84309	-0.565572	-0.636723	-0.416227	0.0890778	-0.760411	-0.430177	-0.641594	-0.100973	0.28962	0.190851	-0.721533	-0.511612	-0.675912	-0.674979	0.058864	-0.4855	-0.364256	-0.745751	0.0708096	0.0173562	0.141829	-0.193503	0.829387	-0.692644	0.189649	-0.486423	-0.199629	-0.179531	-0.353043	-0.415138	-0.686074	-0.457444	0.288469	-0.190231	-0.285058	0.697891	-0.719355	-0.549968	-0.202152	-0.582932	-0.260222
127	N1orN2	-0.410241	-0.814882	0.129603	-0.388331	-0.639873	0.861146	0.100359	-0.581805	-0.687183	-0.359674	-0.732272	0.264875	-0.641303	-0.646289	0.255173	-0.0982415	0.363139	-0.642132	-0.139339	-0.644793	-0.711311	0.261239	-0.883186	-0.870935	-0.58995	0.972154	0.983989	0.93585	1.25912	-0.464639	0.380203	1.09642	0.104206	0.568216	-0.557419	0.789276	-0.368622	-0.658727	0.692981	0.0815022	-0.987158	1.20066	1.1354	-0.641712	-0.183257	0.857221	1.03945	-0.309386
128	N1orN2	-1.10711	-0.724636	-0.289468	-0.358628	-0.459812	0.665153	0.188524	-1.21764	0.132638	-1.37683	-0.584151	0.306357	-0.322043	-1.14089	1.05964	-0.546811	0.951081	0.161694	-0.48811	0.123437	-0.398405	1.00722	-0.572662	-0.428674	-0.198714	1.08023	1.14837	0.651342	0.987131	-0.910038	0.623118	0.833667	-0.670921	1.69425	-0.727179	2.26343	-0.416754	0.092479	0.570654	-0.410232	-1.31298	2.06035	0.772827	0.161103	-0.462064	1.47478	-0.376695	0.496451
129	N1orN2	-0.0592642	-0.519538	0.402401	-0.102008	-0.148407	0.317864	-0.0684936	-0.204196	-0.476833	-0.00277079	0.0633035	-0.0753225	-0.251103	-0.272398	-0.0187421	0.158383	-0.255144	-0.590488	-0.30403	-0.583381	-0.47213	-0.208305	-0.320331	-0.178214	-0.485685	-0.0490039	-0.114627	0.510051	0.401502	0.678329	-0.353842	-0.0783321	-0.155535	-0.527969	0.141938	-0.575404	-0.037386	-0.585205	0.0567109	0.749386	-0.0708986	-0.345515	0.886484	-0.587372	-0.340797	-0.273331	-0.219165	-0.335431
130	N1orN2	-0.242466	-0.761718	-0.384725	-0.430033	-0.462591	1.06886	-0.227844	-0.498073	-0.584736	-0.393018	0.292729	-0.270408	-0.537231	-0.553922	0.826197	-0.648773	0.264991	-0.562219	-0.642822	-0.613174	-0.331531	-0.770957	-0.488231	-0.451361	-0.129715	0.483544	0.471179	0.136612	0.406605	0.00956863	0.0207484	0.605714	-0.751347	0.149624	-0.461147	0.452565	-0.461572	-0.604729	-0.104815	-0.469265	-0.571986	0.339422	-0.241783	-0.562132	-0.643706	0.213121	-0.616588	0.0520419
131	N0	0.489607	-0.410934	-0.764628	-0.85614	-0.596546	-0.833973	-1.32994	-0.00818481	-0.862815	0.127622	1.06533	-1.42295	-0.639008	-0.120835	-0.615741	-0.90313	0.63233	-0.891661	-0.73977	-0.887586	-0.577608	-1.59235	-0.311952	-0.237609	-0.685119	-0.209109	-0.267387	-1.72046	-1.89304	0.897496	-0.973684	0.0154881	-0.871881	0.0772718	-0.606739	-0.157719	-1.04439	-0.881509	-1.73895	-0.939187	0.374548	-0.493503	-1.15969	-0.891563	-0.778446	-0.525932	-1.00574	-0.194841
132	N0	0.865386	-0.227147	-0.0254691	-0.771668	-0.533042	-0.380693	-0.697788	0.336161	-0.874315	0.474633	0.833888	-0.813016	-0.606969	0.215917	-0.526415	-0.415408	0.471595	-0.891598	-0.493822	-0.874559	-0.36242	-2.37611	0.116639	0.217992	-0.603776	-0.707984	-0.777805	-0.65543	-1.2289	2.39199	-3.69207	-0.762946	-0.394294	-0.450525	-0.000448617	-0.603416	-0.871027	-0.855568	-1.72626	0.218425	0.75931	-0.971517	0.253065	-0.891201	-0.549155	-0.809223	-0.808522	-0.421122
133	N0	-0.383159	-0.391738	-0.477161	-0.776388	-0.862825	0.706908	0.134483	-0.63881	-0.0417647	-0.795874	0.313225	0.042186	-0.679728	-0.596754	1.24009	-0.834429	1.44045	0.108567	-0.656139	-0.129895	0.847842	-1.50372	0.331642	0.303566	1.4	0.0042711	0.0325088	-0.767441	-0.0851995	0.467384	-0.499124	0.230981	-0.914246	0.841055	-0.730368	0.490299	-0.987715	-0.0703576	-1.24933	-0.493117	-0.195044	-0.0572135	0.032178	0.107479	-0.582342	-0.163851	-1.06326	0.168858
134	N0	1.29499	0.610721	0.493025	0.324023	0.0435743	2.5092	2.23696	1.19655	0.306009	0.975161	-0.0751279	1.97864	-0.0752028	1.2433	2.02464	0.403349	-0.3555	0.77898	0.806063	0.695962	0.933539	0.00407014	0.520773	0.645678	1.38654	-0.277998	-0.269344	0.632406	0.979379	0.421474	0.0225906	-0.36402	1.04155	-0.528221	0.422468	-0.208415	0.25564	0.72143	0.515002	0.158454	-0.0492551	0.0518649	0.0583075	0.777666	0.850756	-0.18981	1.22691	-0.508336
135	N0	-0.0756759	-1.05474	0.444563	-1.24101	-0.970854	0.0997507	-0.790118	-0.648456	-1.09626	-0.433482	0.353981	-0.777987	-0.988003	-0.753578	0.0703898	0.966423	1.46452	-0.943049	-0.722759	-0.903721	-0.773761	-0.793977	-0.745406	-0.658513	-0.772758	0.5061	0.469735	0.301625	0.142403	1.39339	-1.96659	0.631094	-0.834034	0.701254	-0.778983	0.292374	-1.19839	-0.909211	-1.01316	0.807608	-0.578678	0.056483	3.21795	-0.942365	-0.776194	0.223598	-0.750559	0.0550486
136	N0	1.76248	0.853984	0.349617	-0.0304699	-0.331215	-1.0947	-0.99884	1.51703	-0.534584	1.68186	0.480536	-0.991489	-0.337701	1.39376	-2.10656	-0.0333317	-0.238306	-0.691796	0.539035	-0.640174	-0.67092	0.182598	-0.35973	-0.293708	-0.818765	-0.23931	-0.326584	-0.270743	-0.832388	0.517303	-0.146422	-0.220425	0.957244	-0.497914	0.16244	-0.518113	0.0249276	-0.651788	-0.25409	0.0745102	0.259661	-0.676183	-0.11166	-0.692697	0.442862	-0.503409	0.982237	-0.514052
137	N0	1.40072	1.56007	-0.500723	1.03572	0.716629	-0.981777	0.0415874	1.65374	0.53928	1.55658	0.0544958	0.0232811	0.731877	1.61537	-0.936829	-0.675695	-1.22727	0.140335	1.10424	0.106965	1.21536	-1.28938	1.73165	1.49911	0.636465	-1.75877	-1.71919	-1.29911	-1.71195	0.227449	0.504116	-1.87016	1.44751	-1.15077	1.12295	-1.12399	0.871937	0.178303	-0.617214	-0.551207	2.45465	-1.3689	-1.42843	0.141057	1.12205	-1.26824	0.318877	-0.571494
138	N0	0.150553	0.286797	0.660249	0.484594	0.183072	-0.597431	-0.0203293	0.222992	0.125518	0.210267	0.463528	-0.129807	0.156609	0.204295	-0.213907	0.220711	-0.69659	-0.0999071	-0.337433	-0.19353	0.818679	-1.5926	1.20015	1.22405	0.519292	-1.29926	-1.29353	-1.14357	-1.37738	2.0389	-2.01607	-1.45093	-0.286749	-1.02747	1.12237	-1.07517	0.407526	-0.132787	-0.320248	1.59367	1.26303	-1.14638	0.567648	-0.0987566	-0.292679	-1.00832	-0.802694	-0.352474
139	N0	-0.143398	0.0273006	-0.149963	0.536577	-0.0488042	1.02527	1.32977	-0.00626674	0.240175	-0.0447495	-0.992925	1.40531	-0.0807934	0.0479738	0.96631	-0.241842	-0.521444	0.409327	0.641623	0.418013	-0.138618	0.95045	-0.0543183	0.132762	-0.0849506	-0.0753337	-0.097	0.930258	1.12324	-0.634657	0.732667	-0.066572	0.894489	-0.464052	0.269666	-0.446645	0.507112	0.38932	0.850891	-0.209962	-0.166828	0.101004	-0.432342	0.410252	0.626404	-0.124957	1.21105	-0.494974
140	N0	0.891821	-0.172396	0.0761946	-0.623638	-0.689742	-0.804884	-0.784205	0.483887	-0.863205	0.700018	0.816561	-0.884566	-0.729116	0.364695	-1.20909	-0.0725663	0.53998	-0.856749	-0.292229	-0.798746	-0.828667	0.0982882	-0.768656	-0.709884	-0.864272	0.506003	0.466392	0.310748	0.0462508	0.359457	-0.342939	0.569063	-0.0904835	0.275221	-0.468311	0.0582388	-0.562579	-0.812706	-0.172552	-0.188425	-0.591377	0.226451	0.412591	-0.853578	-0.378263	0.237949	0.341698	-0.353459
141	N0	-1.37523	-0.784633	-0.326233	0.161974	0.098027	0.371081	0.427546	-1.29579	0.110358	-1.3132	-0.892822	0.590413	0.0883176	-1.24686	0.544234	-0.22532	-0.276818	-0.0464814	-0.415328	-0.102479	-0.304958	0.551488	-0.325403	-0.118195	-0.188671	0.33512	0.341288	0.732793	0.920814	-0.386161	0.500262	0.390017	-0.466177	-0.0565648	-0.0330674	0.507072	0.169027	-0.116765	0.696068	-0.127956	-0.533114	0.704026	-0.0185778	-0.0474073	-0.377167	0.315598	-0.484505	0.0623465
142	N0	-0.0880911	1.32922	-0.0705218	0.535277	-0.113752	0.257549	1.82472	0.32861	1.74288	-0.298077	0.388964	1.50522	0.194293	0.660884	1.02339	0.170041	-0.090686	2.85455	0.148064	2.48285	2.46954	0.297555	1.32709	1.10079	3.28935	-0.564092	-0.503579	-0.306117	0.237762	-0.311814	0.553766	-0.45031	-0.144352	-0.245535	0.309552	-0.11265	0.318761	2.51956	0.119012	-0.147702	0.333598	-0.397843	-0.328255	2.85679	0.392303	-0.501266	-0.519017	-0.212623
143	N0	-0.159595	-1.12478	-0.311771	-1.26223	-0.771	-0.915878	-1.77847	-0.729319	-1.08379	-0.517312	0.43787	-1.66445	-0.843218	-0.841714	-0.750711	-0.441978	1.14036	-1.0066	-0.756073	-0.947073	-1.09858	0.686036	-1.2925	-1.56876	-1.10165	1.25443	1.26687	-0.067258	-0.415654	-0.286521	-0.0623395	1.66607	-0.899202	1.12016	-1.26144	0.453529	-1.1397	-0.970924	-0.667044	-0.392535	-0.920343	0.474365	0.575627	-1.00693	-0.819561	0.794193	-0.563479	0.165407
144	N0	-1.86837	-0.0667307	-0.324611	1.38122	0.78128	-0.654831	0.0611516	-1.11036	1.09782	-1.24171	-2.68517	0.702339	0.925209	-0.921598	-0.236901	-0.692914	-1.24418	0.960971	0.904185	0.82663	1.56312	-0.399612	1.8768	1.64618	1.07368	-1.72384	-1.67734	-0.639772	-1.01338	0.804701	0.137972	-1.92872	1.13238	-1.21467	1.60501	-1.14185	1.26959	0.885456	0.243161	0.640731	2.05582	-1.32469	-0.733793	0.960849	1.0456	-1.20473	0.0835141	-0.543813
145	N0	-0.138794	-1.02852	0.300649	-1.21987	-0.619547	-0.411028	-1.13981	-0.728811	-1.033	-0.553291	0.132566	-1.03097	-0.75161	-0.837756	-0.394061	0.743915	1.1649	-0.982522	-0.687116	-0.931466	-1.06783	0.585555	-1.36362	-1.55708	-1.01683	1.70768	1.73454	0.716401	0.801376	-0.521939	0.12756	1.51593	-0.75652	1.58612	-1.30027	1.57441	-1.09282	-0.954128	0.322993	0.0826983	-1.50045	2.2247	2.55693	-0.982982	-0.74745	2.0314	0.0532788	0.317047
146	N0	-0.108076	-1.09648	-0.699513	-1.61034	-0.774343	-1.25768	-2.02141	-0.715141	-1.21856	-0.442596	1.10843	-2.03938	-0.84336	-0.841387	-1.32197	-0.683333	1.33045	-1.10092	-0.984558	-1.02883	-1.29161	1.68635	-1.92488	-2.81382	-1.24984	3.00975	3.09271	0.426347	0.329167	-3.05238	1.06513	2.08215	-1.46757	3.28563	-2.31687	3.42098	-1.43288	-1.06091	-0.111827	-1.06894	-1.79489	2.72174	-0.614511	-1.09935	-1.05454	4.01864	-0.56313	5.7836
147	N0	-0.319427	-0.920686	-0.362774	-0.646805	-0.667041	-0.498182	-0.98362	-0.603479	-0.865639	-0.333643	-0.615804	-0.713271	-0.69279	-0.697509	-0.918549	-0.281816	0.490947	-0.857001	-0.262332	-0.807921	-0.516606	-1.1845	-0.294494	-0.0849715	-0.586058	-0.01907	-0.0746763	-0.16715	-0.452812	1.29329	-1.37903	-0.182173	-0.0375436	-0.132745	-0.191308	-0.135368	-0.616165	-0.801813	-0.714275	-0.296226	-0.245784	-0.242548	-0.00545113	-0.857013	-0.332623	-0.146422	0.0427542	-0.39832
148	N0	-0.280414	-0.349369	0.407236	0.305717	-0.205668	0.394441	0.415034	-0.25965	-0.164491	-0.146217	-0.871679	0.574339	-0.234462	-0.272987	0.326593	0.90871	-0.415907	-0.189748	0.2137	-0.183269	-0.113113	0.0809642	0.0310632	0.198946	-0.0869046	-0.318097	-0.35129	0.552968	0.545993	0.503637	0.00250401	-0.165445	0.493389	-0.631027	0.488744	-0.824728	0.377729	-0.181627	0.178493	0.942979	0.260765	-0.638859	0.750287	-0.186404	0.214429	-0.524368	0.162441	-0.455339
149	N0	0.869917	0.492437	-0.131218	0.379645	0.0626818	0.410411	0.475684	0.831219	0.295487	0.630948	0.403507	0.319403	0.0716452	0.842233	0.76324	-0.218656	-0.45821	0.332415	0.307725	0.496182	-0.336604	1.28073	-0.144712	0.0695376	-0.365735	-0.0720184	-0.0856407	0.586454	0.5109	-0.559886	0.715552	0.0206582	0.476229	-0.421184	0.244057	-0.320073	0.446407	0.451301	0.452275	-0.39987	-0.120778	-0.0732491	-0.645679	0.332464	0.253644	-0.201916	0.397076	-0.390934
150	N0	-1.70576	0.173352	-0.382174	1.37929	1.35907	-0.0890042	1.13627	-0.854623	1.47122	-1.1917	-1.13786	1.27075	1.38436	-0.610563	0.278344	-0.203186	-1.30895	1.47401	0.106615	1.32587	1.24093	0.372365	1.29571	1.27585	1.14437	-1.13962	-1.10544	0.090932	-0.0119003	-0.20648	0.753931	-1.13458	0.0468365	-1.06034	1.22779	-1.01745	1.31659	1.34057	0.713711	0.0686698	1.21179	-1.06442	-0.947206	1.47302	0.233875	-0.96464	-0.467598	-0.243247
151	N0	0.465272	0.941701	0.257172	1.03102	0.556917	-0.339371	0.617774	0.766464	0.723418	0.541575	-1.2008	0.831538	0.613749	0.80687	-0.0186532	1.09164	-1.00715	0.565665	1.4	0.553577	0.780509	0.025833	0.929832	1.05253	0.730765	-0.896055	-0.877963	0.0600057	-0.0496703	0.330186	0.370045	-0.933001	1.66092	-0.954338	1.11159	-0.704569	1.05352	0.576222	0.745728	0.374905	0.760453	-0.707666	-0.458607	0.568273	1.45637	-0.739087	1.37061	-0.548708
152	N0	0.00406618	-0.337566	0.218026	-0.17421	-0.76417	2.62355	1.40501	-0.033226	-0.110703	-0.0637785	-0.393961	1.32654	-0.690126	0.0237358	2.12503	0.616168	0.599427	0.421382	0.155047	0.46128	-0.386923	1.31306	-0.670237	-0.604877	-0.127719	1.0255	1.05114	1.03559	1.57531	-1.14981	0.775871	0.84719	0.281366	1.14963	-0.58001	2.09392	-0.17827	0.414901	0.839131	-0.149929	-1.13221	1.80584	0.977881	0.419064	0.140173	1.27677	1.4189	-0.267039
153	N0	2.01817	0.603647	-0.364341	-0.703349	-0.717818	-0.54113	-0.556853	1.51134	-0.828815	1.58753	2.55911	-1.10632	-0.740273	1.37573	-0.509329	-0.284239	0.647525	-0.807272	-0.626415	-0.756822	-0.855905	0.389176	-0.940531	-0.989046	-0.821871	0.841081	0.835897	0.107775	0.0287625	-0.85486	0.514004	1.10624	-0.684057	0.738692	-0.88672	1.08416	-0.610448	-0.774498	-0.368527	-0.868522	-0.798228	0.845045	-0.741084	-0.805532	-0.68481	0.598701	-0.468082	0.133066
154	N1orN2	-0.213481	-0.332238	0.0238587	0.1932	-0.106054	0.854785	0.782377	-0.248406	-0.174713	-0.186181	-0.364074	0.773641	-0.184119	-0.266657	0.642139	-0.132321	-0.360584	-0.223858	-0.0870403	-0.226058	-0.159295	0.0620018	0.124975	0.283025	-0.2479	-0.514946	-0.574346	0.696004	0.594086	0.779204	-0.333587	-0.598881	0.0942136	-0.667082	0.443934	-0.720751	0.196198	-0.225277	-0.0544528	0.376811	0.381312	-0.670863	0.102769	-0.224812	-0.108133	-0.602336	-0.285305	-0.430287
155	N1orN2	1.70944	3.58284	6.21109	2.60482	3.58332	-1.41032	1.54749	3.70264	2.57235	3.91479	-1.0798	1.61712	3.35149	3.77766	-2.03714	5.37007	-2.15402	2.14365	5.21595	2.52403	1.80364	0.757768	2.07706	1.79651	1.23651	-1.80159	-1.73585	0.0232454	-0.370335	0.754241	0.537695	-1.99951	4.2236	-1.5412	2.9716	-1.47411	2.80331	2.51688	2.2666	5.4619	2.10891	-1.34867	0.269126	2.14411	5.02931	-1.22059	4.35733	-0.607308
156	N1orN2	-0.181944	1.13418	0.0187039	1.16058	0.663628	-0.36611	1.33688	0.344836	1.15508	0.0719115	0.0927265	1.14925	0.91721	0.472942	0.135392	0.307994	-1.10777	1.14448	0.214903	1.10812	0.300875	1.00806	0.335338	0.556266	0.411224	-0.17468	-0.145964	0.582487	0.692774	-1.05486	1.05018	-0.201018	0.235606	-0.679819	0.733625	-0.520642	1.19481	1.0741	1.55888	-0.132358	-0.151321	0.172301	-0.669567	1.14347	0.299401	-0.10694	0.0801487	-0.246096
157	N1orN2	-0.619084	1.33557	1.00884	2.04179	2.50677	-1.25682	0.157146	0.751326	1.74634	0.83349	-0.909587	0.357483	2.28707	0.869719	-1.31726	1.83886	-1.8959	1.23819	1.27855	1.50027	0.293087	1.25403	0.725747	0.853589	0.0361094	-0.972623	-0.987128	0.0269511	-0.326308	-0.224986	0.92854	-1.08124	1.39712	-1.35917	2.00327	-1.23189	2.24174	1.44702	2.27691	1.40652	0.854336	-0.81228	-0.528324	1.23848	1.26074	-0.792971	1.31287	-0.47115
158	N1orN2	-0.0212382	-0.815696	-0.103872	-0.855755	-0.643945	-1.12924	-1.72746	-0.407098	-0.978694	-0.0727507	-0.266233	-1.44963	-0.703548	-0.520916	-1.93328	0.281797	0.580593	-0.966679	-0.247065	-0.88914	-1.13569	1.15185	-1.41053	-1.75291	-1.12468	1.57099	1.57606	0.506196	0.302873	-1.27283	0.661963	1.56886	-0.00507017	0.927544	-1.13089	0.386324	-0.681907	-0.918093	0.323599	-0.335012	-1.18873	1.15627	0.603705	-0.966895	-0.335791	1.46998	1.35477	-0.219748
159	N1orN2	-0.847669	-1.02382	-0.518229	-0.269155	-0.296407	0.863215	-0.115568	-1.0081	-0.349119	-0.93817	-0.636425	0.0524776	-0.346503	-1.01972	0.872329	-0.522169	0.119051	-0.370439	-0.388658	-0.461868	-0.233473	-0.43118	-0.136544	0.0049503	-0.184117	-0.0910507	-0.105745	0.344274	0.337385	0.517131	-0.341256	0.162655	-0.321101	-0.201726	-0.158486	-0.393396	-0.356832	-0.454485	-0.586663	-0.384225	0.0109723	-0.521007	-0.422048	-0.372733	-0.375191	-0.383148	-0.525247	-0.347
160	N1orN2	1.61144	-0.0594249	-0.0244637	-1.39412	-0.870241	0.118363	-0.614344	0.862485	-1.19794	1.05241	1.9551	-1.01077	-0.936139	0.714563	-0.474347	0.241251	1.33931	-1.03285	-0.728081	-1.02133	-0.827972	-1.71009	-0.768132	-0.75991	-0.860141	0.410618	0.365353	0.149758	-0.148723	1.58529	-2.45453	0.656354	-0.807803	0.515256	-0.906982	0.0240734	-1.39524	-1.02461	-1.47194	-0.343574	-0.433674	-0.249984	0.435864	-1.03322	-0.788873	-0.0303326	-0.775103	-0.121351
161	N1orN2	0.235177	-0.429682	-0.848397	-0.552479	-0.241257	-1.26657	-1.53564	-0.0474328	-0.737041	0.182632	0.627793	-1.49752	-0.393971	-0.156462	-1.57748	-1.12822	0.0432519	-0.870661	-0.516225	-0.833707	-0.505108	-1.42211	-0.026199	-0.0523902	-0.762458	-0.63102	-0.718291	-2.2753	-2.64613	0.729429	-0.580654	-0.74597	-0.447607	-0.442676	-0.242429	-0.608704	-0.583999	-0.825644	-1.69344	-1.04317	0.658161	-0.910809	-1.43033	-0.871275	-0.568289	-0.764867	-0.770093	-0.369499
162	N1orN2	-2.44385	0.0347486	-0.295394	1.50488	1.42826	-0.644169	0.359833	-1.34487	1.59956	-1.53784	-1.61611	0.705818	1.5972	-1.05462	-0.142997	-0.177638	-1.4545	1.53402	0.167254	1.63956	0.725815	0.987601	0.850056	1.01922	0.70598	-0.651136	-0.607961	-0.0126686	-0.0812272	-0.70392	0.998214	-0.724886	0.0567894	-0.996087	1.2025	-0.881358	1.55427	1.60687	1.61662	0.172696	0.344494	-0.181116	-0.765344	1.52826	0.251805	-0.427922	-0.343533	0.148795
[truncated: 53 more columns]
